# Supplementary material
Source: PubMed Central journal article supplement (PMC3309185)
Supplement: mmc1.pdf [file mmc1.pdf]

## Supplemental Data

### Large-Scale Gene-Centric Meta-Analysis across

### 39 Studies Identifies Type 2 Diabetes Loci

Richa Saxena, Clara C. Elbers, Yiran Guo, Inga Peter, Tom R. Gaunt, Jessica L. Mega, Matthew B. Lanktree, Archana Tare, Berta Almoquera Castillo, Yun R. Li, Toby Johnson, Marcel Bruinenberg, Diane Gilbert-Diamond, Ramakrishnan Rajagopalan, Benjamin F. Voight, Ashok Balasubramanyam, John Barnard, Florianne Bauer, Jens Baumert, Tushar Bhangale, Bernhard O. Böhm, Peter S. Braund, Paul R. Burton, Hareesh R. Chandrupatla, Robert Clarke, Rhonda M. Cooper-DeHoff, Errol D. Crook, George Davey-Smith, Ian N. Day, Anthonius de Boer, Mark C.H. de Groot, Fotios Drenos, Jane Ferguson, Caroline S. Fox, Clement E. Furlong, Quince Gibson, Christian Gieger, Lisa A. Gilhuijs-Pederson, Joseph T. Glessner, Anuj Goel, Yan Gong, Struan F.A. Grant, Diederick E. Grobbee, Claire Hastie, Steve E. Humphries, Cecilia E. Kim, Mika Kivimaki, Marcus Kleber, Christa Meisinger, Meena Kumari, Taimour Y Langae, Debbie A. Lawlor, Mingyao Li, Maximilian T. Lobbmeyer, Anke-Hilse Maitland-van der Zee, Matthijs F.L. Meijs, Cliona M. Molony, David A. Morrow, Gurunathan Murugesan, Solomon K. Musani, Christopher P. Nelson, Stephen J. Newhouse, Jeffery R. O'Connell, Sandosh Padmanabhan, Jutta Palmen, Sanjay R. Patel, Carl J. Pepine, Mary Pettinger, Thomas S. Price, Suzanne Rafelt, Jane Ranchalis, Asif Rasheed, Elisabeth Rosenthal, Ingo Ruczinski, Sonia Shah, Haiqing Shen, Günther Silbernagel, Erin N. Smith, Annemieke W.M. Spijkerman, Alice Stanton, Michael W. Steffes, Barbara Thorand, Mieke Trip, Pim van der Harst, Daphne L. van der A, Erik P.A. van Iperen, Jessica van Setten, Jana V. van Vliet-Ostaptchouk, Niek Verweij, Bruce H.R. Wolffenbuttel, Taylor Young, M. Hadi Zafarmand, Joseph M. Zmuda, the Look AHEAD Research Group, DIAGRAM consortium, Michael Boehnke, David Altshuler, Mark McCarthy, W.H. Linda Kao, James S. Pankow, Thomas P. Cappola, Peter Sever, Neil Poulter, Mark Caulfield, Anna Dominiczak, Denis C. Shields, Deepak L. Bhatt, Li Zhang, Sean P. Curtis, John Danesh, Juan P. Casas Yvonne T. van der Schouw, N. Charlotte Onland-Moret, Pieter A. Doevendans, Gerald W. Dorn II, Martin Farrall, Garret A. FitzGerald, Anders Hamsten Robert Hegele, Aroon D. Hingorani, Marten H. Hofker, Gordon S. Huggins, Thomas Illig, Gail P. Jarvik, Julie A. Johnson, Olaf H. Klungel, William C. Knowler, Wolfgang Koenig, Winfried März, James B. Meigs, Olle Melander, Patricia B. Munroe, Braxton D. Mitchell, Susan J. Bielinski, Daniel J. Rader, Muredach P. Reilly, Stephen S. Rich, Jerome I. Rotter, Danish Saleheen, Nilesh J. Samani, Eric E. Schadt, Alan R. Shuldiner, Roy Silverstein, Kandice Kottke-Marchant, Philippa J. Talmud, Hugh Watkins, Folkert W. Asselbergs, Paul IW de Bakker, Jeanne McCaffery, Cisca Wijmenga, Marc S. Sabatine, James G. Wilson, Alex Reiner, Donald W. Bowden, Hakon Hakonarson, David S. Siscovick, and Brendan J. Keating

## Supplemental Acknowledgements

ASCOT HumanCVD BeadChip genotyping was supported by the British Heart Foundation (grant number PG/07/131/24254, to P.B.M.). This work was supported by Pfizer, New York, NY, USA, for the ASCOT study and the collection of the ASCOT DNA repository; by Servier Research Group, Paris, France; and by Leo Laboratories, Copenhagen, Denmark. We thank all ASCOT trial participants, physicians, nurses, and practices in the participating countries for their important contribution to the study. In particular we thank Clare Muckian and David Toomey for their help in DNA extraction, storage, and handling. We thank Professor Thomas Hedner (Department of Clinical Pharmacology, Sahlgrenska Academy, Gotheburg, Sweden) and Professor Sverre Kjeldsen (Ullevaal University Hospital, University of Oslo, Oslo, Norway), who are investigators of the NORDIL study. Professor Kjeldsen is also an investigator of the ASCOT trial.

The British Women's Heart and Health Study is supported by funding from the British Heart Foundation and the Department of Health Policy Research Programme (England). We thank the BWHHS data collection team, General Practitioners who helped with recruitment of participants and the participants. We thank all of the participants and the general practitioners, research nurses and data management staff who supported data collection and preparation. The BWHHS is coordinated by Shah Ebrahim (PI), Debbie Lawlor and Juan-Pablo Casas, with genotyping funded by the BHF (PG/07/131/24254, PI Tom Gaunt). The BRIGHT study was supported by the Medical Research Council of Great Britain (G9521010D) and the British Heart Foundation (PG/02/128).

The CARE Consortium wishes to acknowledge the support of the National Heart, Lung, and Blood Institute and the contributions of the research institutions, study investigators, field staff and study participants in creating this resource for biomedical research (NHLBI contract number HHSN268200960009C). The following nine parent studies have contributed parent study data, ancillary study data, and DNA samples through the Massachusetts Institute of Technology - Broad Institute (N01-HC-65226) to create this genotype/phenotype database for wide dissemination to the biomedical research community: the Atherosclerosis Risk in Communities (ARIC) study, the Cardiovascular Health Study (CHS), the Cleveland Family Study (CFS), the Cooperative Study of Sickle Cell Disease (CSSCD), the Coronary Artery Risk Development in Young Adults (CARDIA) study, the Framingham Heart Study (FHS), the Jackson Heart Study (JHS), the Multi-Ethnic Study of Atherosclerosis (MESA), and the Sleep Heart Health Study (SHHS). The ARIC study is carried out as a collaborative study supported by National Heart, Lung, and Blood Institute contracts N01-HC-55015, N01-HC-55016, N01-HC-55018, N01-HC-55019, N01-HC-55020, N01-HC-55021, and N01-HC-55022. The authors thank the staff and participants of the ARIC study for their important contributions.

CCCS was supported by grant P50HL81011 from the National Heart, Lung and Blood Institute, National Institutes of Health, U.S. Department of Health and Human Services. The authors thank the CHARISMA Investigators for phenotype and sample collection.

The Cincinnati Heart Failure Study (CHFS) and the University of Pennsylvania Heart Failure Study (PHFS) gratefully thank all the participants and the investigators of this project.

CLEAR support (GPJ) came from R01 HL67406, the Northwest Institute of Genetic Medicine, and the State of Washington Life Sciences Discovery Fund. The CLEAR investigators sincerely thank the participants for their efforts.

The EPIC-NL study was funded by 'Europe against Cancer' Programme of the European Commission (SANCO), Dutch Ministry of Public Health, Welfare and Sports (VWS), Netherlands Cancer Registry (NKR), LK Research Funds, Dutch Prevention Funds, Dutch Cancer Society; ZonMW the Netherlands Organisation for Health Research and Development, World Cancer Research Fund (WCRF) (The Netherlands). Genotyping was funded by IOP Genomics grant IGE05012 from Agentschap NL. We thank Statistics Netherlands and Netherlands Cancer Registry (NKR) for follow-up data on cancer, cardiovascular disease, vital status and causes of death.

The International Verapamil SR Trandolapril Study (INVEST) and Pharmacogenomics Evaluation of Antihypertensive Responses (PEAR) studies thank the participants and the investigators that made this collection possible. INVEST-GENES was funded by NIH grants HL074730, HL69758, HL077113, GM074492 and RR017568, a grant from Abbott Pharmaceuticals and the Florida Opportunity Fund. This work was supported in part by the NIH/NCRR Clinical and Translational Science Award to the University of Florida UL1 RR029890.

We acknowledge the Look AHEAD sites that participated in this ancillary study. Federal Sponsors: National Institute of Diabetes and Digestive and Kidney Diseases: Barbara Harrison, MS; Van S. Hubbard, MD PhD; Susan Z. Yanovski, MD. National Heart, Lung, and Blood Institute: Lawton S. Cooper, MD, MPH; Jeffrey Cutler, MD, MPH; Eva Obarzanek, PhD, MPH, RD. Centers for Disease Control and Prevention: Edward W. Gregg, PhD; David F. Williamson, PhD; Funding and Support: This study is supported by the Department of Health and Human Services through the following cooperative agreements from the National Institutes of Health: DK57136, DK57149, DK56990, DK57177, DK57171, DK57151, DK57182, DK57131, DK57002, DK57078, DK57154, DK57178, DK57219, DK57008, DK57135, and DK56992. The following federal agencies have contributed support: National Institute of Diabetes and Digestive and Kidney Diseases; National Heart, Lung, and Blood Institute; National Institute of Nursing Research; National Center on Minority Health and Health Disparities; Office of Research on Women's Health; and the Centers for Disease Control and Prevention. This research was supported in part by the Intramural Research Program of the National Institute of Diabetes and Digestive and Kidney Diseases. The Indian Health Service (I.H.S.) provided personnel, medical oversight, and use of facilities. The opinions expressed in this paper are those of the authors and do not necessarily reflect the views of the I.H.S. or other funding sources. Additional support was received from The Johns Hopkins Medical Institutions Bayview General Clinical Research Center (M01-RR-02719); the Massachusetts General Hospital Mallinckrodt General Clinical Research Center (M01-RR-01066); the University of Colorado Health Sciences Center General Clinical Research Center (M01 RR00051) and Clinical Nutrition Research Unit (P30 DK48520); the University of Tennessee at Memphis General Clinical Research Center (M01RR00211-40); the University of Pittsburgh General Clinical Research Center (M01 RR000056 44) and NIH grant (DK 046204); and the VA Puget Sound Health Care System Medical Research Service, Department of Veterans Affairs. The following organizations have committed to make major contributions to Look AHEAD: Federal Express; Health Management Resources; Johnson & Johnson,

LifeScan Inc.; Optifast-Novartis Nutrition; Roche Pharmaceuticals; Ross Product Division of Abbott Laboratories; Slim-Fast Foods Company; and Unilever.

LURIC thanks their participants and researchers and acknowledges that it has received funding through the 6th Framework Program (integrated project Bloodomics, grant LSHM-CT-2004-503485) and 7th of Framework Program (integrated project Atheroremo, Grant Agreement number 201668) of the European Union.

MEDAL was supported by Merck & Co (Whitehouse Station, NJ, USA). The authors thank Amarjot Kaur and the current or former employees of Merck Research Laboratories who contributed to the conduct and analysis of the MEDAL data.

The MERLIN-TIMI 36 trial thanks the subjects and the investigators and specifically acknowledges the funding support of CV Therapeutics for this study.

The MONICA/KORA Augsburg studies were financed by the Helmholtz Zentrum München, German Research Center for Environmental Health, Neuherberg, Germany and supported by grants from the German Federal Ministry of Education and Research (BMBF). Part of this work was financed by the German National Genome Research Network (NGFNPlus, project number 01GS0834), by the German Research Foundation (TH-784/2-1 and TH-784/2-2), by the European Foundation for the Study of Diabetes and through additional funds from the Helmholtz Zentrum München, the German Diabetes Center and the University of Ulm. Furthermore, the research was supported within the Munich Center of Health Sciences (MC Health) as part of LMU innovative.

PREVEND genetics is supported by the Dutch Kidney Foundation (Grant E033), the National Institutes of Health (grant LM010098), The Netherlands organisation for health research and development (NWO VENI grant 916.761.70), and the Dutch Inter University Cardiology Institute Netherlands (ICIN).

The authors acknowledge all MR technicians, research nurses and medical students involved in SMART Heart for valuable support. SMART Study Group: A. Algra, Julius Centre for Health Sciences and Primary Care and Rudolph Magnus Institute of Neuroscience, Department of Neurology; Y. van der Graaf, G.E.H.M. Rutten, D.E. Grobbee, Julius Centre for Health Sciences and Primary Care; F.L.J. Visseren, Department of Internal Medicine; P.A. Doevendans, Department of Cardiology; F.L. Moll, Department of Vascular Surgery; L.J. Kappelle, Department of Neurology; W.P. Mali, Department of Radiology. Folkert W. Asselbergs is supported by a clinical fellowship from the Netherlands Organisation for Health Research and Development (ZonMw grant 90700342). M.F.L.M. was financially supported by EUGeneHeart, grant number LSHM-CT-2005-018833.

The Utrecht Cardiovascular Pharmacogenetics (UCP) was supported under a TI Pharma grant T6-101 'The Mondriaan project'.

The University of Pennsylvania Coronary Artery Calcification Study (PennCAC) and The University of Pennsylvania Catheterization study program (PennCATH) gratefully acknowledge the participation of the study subject and are indebted to the investigators on these teams.

This work on WH-II was supported by the British Heart Foundation (BHF) PG/07/133/24260, RG/08/008, SP/07/007/23671, and a Senior Fellowship to Professor Hingorani (FS/2005/125). S.E.H. and A.D. are BHF Chairholders. M. Kumari's time on this manuscript was partially supported by the National Heart Lung and Blood Institute (NHLBI: HL36310). The WH-II study has been supported by grants from the Medical Research Council; British Heart Foundation; Health and Safety Executive; Department of Health; National Institute on Aging, NIH, US (AG13196); Agency for Health Care Policy Research (HS06516); and the John D. and Catherine T. MacArthur Foundation Research Networks on Successful Midlife Development and Socio-economic Status and Health. A.D. is also supported by BHF grants (RG/07/005/23633 and SP/08/005/25115) and EU Ingenious HyperCare Consortium: Integrated Genomics, Clinical Research, and Care in Hypertension (LSHM-C7-2006-037093). J.W. is an employee of GlaxoSmithKline.

The WHI program is funded by the National Heart, Lung, and Blood Institute, National Institutes of Health, U.S. Department of Health and Human Services through contracts N01WH22110, 24152, 32100-2, 32105-6, 32108-9, 32111-13, 32115, 32118-32119, 32122, 42107-26, 42129-32, and 44221.

Berta Almoogguera Castillo is a recipient of a grant-contract "Ayudas para contratos de formacion en Investigacion Rio Hortega" (Research Training program Rio Hortega) from Instituto de Salud Carlos III (Ministry of Health), Spain.

B.J.K. was partially supported by a National Institute of Health Clinical and Translational Research Award (RR U54 RR023567) to the University of Pennsylvania.

## **Disclosures**

Cliona M. Molony and Sean Curtis are employees of Merck Pharmaceuticals, USA and Eric E. Schadt is a part-time employee of Pacific BioSciences, CA. Carl J. Pepine has disclosed receiving grant support from Abbott, AstraZeneca, Baxter Healthcare, Berlex Labs/Bayer HealthCare, Boehringer Ingelheim, Cardium Therapeutics, Daiichi-Sankyo Lilly, Forest Labs, GlaxoSmithKline, Merck, Novartis, Pfizer, Reliant, sanofi-aventis, Schering-Plough, Medicines Company, Viron Therapeutics, and Wyeth-Ayerst Labs. Carl J. Pepine has been a consultant for Abbott Labs, Angioblast Systems, Athersys, Baxter Healthcare, Boehringer Ingelheim, Gilead, Medtelligence, NicOx, Pfizer, Sanofi-sventis, Schering-Plough, Servier, and Slack. Carl J. Pepine holds two patents with the University of Florida. The corresponding authors declare that none of the other authors have a financial interest related to this work.

## DIAGRAM CONSORTIUM

Benjamin F Voight<sup>1,2,3</sup>, Laura J Scott<sup>4</sup>, Valgerdur Steinthorsdottir<sup>5</sup>, Andrew P Morris<sup>6</sup>, Christian Dina<sup>7,8</sup>, Ryan P Welch<sup>9</sup>, Eleftheria Zeggini<sup>6,10</sup>, Cornelia Huth<sup>11a,12</sup>, Yurii S Aulchenko<sup>13</sup>, Gudmar Thorleifsson<sup>5</sup>, Laura J McCulloch<sup>14</sup>, Teresa Ferreira<sup>6</sup>, Harald Grallert<sup>11b,12</sup>, Najaf Amin<sup>13</sup>, Guanming Wu<sup>15</sup>, Cristen J Willer<sup>4</sup>, Soumya Raychaudhuri<sup>1,2,16</sup>, Steve A McCarroll<sup>1,17</sup>, Claudia Langenberg<sup>18</sup>, Oliver M Hofmann<sup>19</sup>, Josée Dupuis<sup>20,21</sup>, Lu Qi<sup>22-24</sup>, Ayellet V Segrè<sup>1,2,17</sup>, Mandy van Hoek<sup>25</sup>, Pau Navarro<sup>26</sup>, Kristin Ardlie<sup>1</sup>, Beverley Balkau<sup>27,28</sup>, Rafn Benediktsson<sup>29,30</sup>, Amanda J Bennett<sup>14</sup>, Roza Blagieva<sup>31</sup>, Eric Boerwinkle<sup>32</sup>, Lori L Bonnycastle<sup>33</sup>, Kristina Bengtsson Boström<sup>34</sup>, Bert Bravenboer<sup>35</sup>, Suzannah Bumpstead<sup>10</sup>, Noël P Burtt<sup>1</sup>, Guillaume Charpentier<sup>36</sup>, Peter S Chines<sup>33</sup>, Marilyn Cornelis<sup>24</sup>, David J Couper<sup>37</sup>, Gabe Crawford<sup>1</sup>, Alex SF Doney<sup>38,39</sup>, Katherine S Elliott<sup>6</sup>, Amanda L Elliott<sup>1,17,40</sup>, Michael R Erdos<sup>33</sup>, Caroline S Fox<sup>21,41</sup>, Christopher S Franklin<sup>42</sup>, Martha Ganser<sup>4</sup>, Christian Gieger<sup>11c</sup>, Niels Grarup<sup>43</sup>, Todd Green<sup>1,2</sup>, Simon Griffin<sup>18</sup>, Christopher J Groves<sup>14</sup>, Candace Guiducci<sup>1</sup>, Samy Hadjadj<sup>44</sup>, Neelam Hassanali<sup>14</sup>, Christian Herder<sup>45</sup>, Bo Isomaa<sup>46,47</sup>, Anne U Jackson<sup>4</sup>, Paul RV Johnson<sup>48</sup>, Torben Jørgensen<sup>49,50</sup>, Wen HL Kao<sup>51,52</sup>, Norman Klopp<sup>11b</sup>, Augustine Kong<sup>5</sup>, Peter Kraft<sup>22,23</sup>, Johanna Kuusisto<sup>53</sup>, Torsten Lauritzen<sup>54</sup>, Man Li<sup>51</sup>, Aloysius Lieveise<sup>55</sup>, Cecilia M Lindgren<sup>6</sup>, Valeriya Lyssenko<sup>56</sup>, Michel Marre<sup>57,58</sup>, Thomas Meitinger<sup>59,60</sup>, Kristian Midthjell<sup>61</sup>, Mario A Morken<sup>33</sup>, Narisu Narisu<sup>33</sup>, Peter Nilsson<sup>56</sup>, Katharine R Owen<sup>14</sup>, Felicity Payne<sup>10</sup>, John RB Perry<sup>62,63</sup>, Ann-Kristin Petersen<sup>11c</sup>, Carl Platou<sup>61</sup>, Christine Proença<sup>7</sup>, Inga Prokopenko<sup>6,14</sup>, Wolfgang Rathmann<sup>64</sup>, N William Rayner<sup>6,14</sup>, Neil R Robertson<sup>6,14</sup>, Ghislain Rocheleau<sup>65-67</sup>, Michael Roden<sup>45,68</sup>, Michael J Sampson<sup>69</sup>, Richa Saxena<sup>1,2,40</sup>, Beverley M Shields<sup>62,63</sup>, Peter Shrader<sup>3,70</sup>, Gunnar Sigurdsson<sup>29,30</sup>, Thomas Sparsø<sup>43</sup>, Klaus Strassburger<sup>64</sup>, Heather M Stringham<sup>4</sup>, Qi Sun<sup>22,23</sup>, Amy J Swift<sup>33</sup>, Barbara Thorand<sup>11a</sup>, Jean Tichet<sup>71</sup>, Tiinamaija Tuomi<sup>46,72</sup>, Rob M van Dam<sup>24</sup>, Timon W van Haeften<sup>73</sup>, Thijs van Herpt<sup>25,55</sup>, Jana V van Vliet-Ostaptchouk<sup>74</sup>, G Bragi Walters<sup>5</sup>, Michael N Weedon<sup>62,63</sup>, Cisca Wijmenga<sup>75</sup>, Jacqueline Witteman<sup>13</sup>, Richard N Bergman<sup>76</sup>, Stephane Cauchi<sup>7</sup>, Francis S Collins<sup>77</sup>, Anna L Gloyn<sup>14</sup>, Ulf Gyllensten<sup>78</sup>, Torben Hansen<sup>43,79</sup>, Winston A Hide<sup>19</sup>, Graham A Hitman<sup>80</sup>, Albert Hofman<sup>13</sup>, David J Hunter<sup>22,23</sup>, Kristian Hveem<sup>61,81</sup>, Markku Laakso<sup>53</sup>, Karen L Mohlke<sup>82</sup>, Andrew D Morris<sup>38,39</sup>, Colin NA Palmer<sup>38,39</sup>, Peter P Pramstaller<sup>83</sup>, Igor Rudan<sup>42,84,85</sup>, Eric Sijbrands<sup>25</sup>, Lincoln D Stein<sup>15</sup>, Jaakko Tuomilehto<sup>86</sup>, Andre Uitterlinden<sup>25</sup>, Mark Walker<sup>87</sup>, Nicholas J Wareham<sup>18</sup>, Richard M Watanabe<sup>76,88</sup>, Goncalo R Abecasis<sup>4</sup>, Bernhard O Boehm<sup>31</sup>, Harry Campbell<sup>42</sup>, Mark J Daly<sup>1,2</sup>, Andrew T Hattersley<sup>62,63</sup>, Frank B Hu<sup>22-24</sup>, James B Meigs<sup>3,70</sup>, James S Pankow<sup>89</sup>, Oluf Pedersen<sup>43,90,91</sup>, H.-Erich Wichmann<sup>11d,12,,92</sup>, Inês Barroso<sup>10</sup>, Jose C Florez<sup>1,2,3,93</sup>, Timothy M Frayling<sup>62,63</sup>, Leif Groop<sup>56,72</sup>, Rob Sladek<sup>65-67</sup>, Unnur Thorsteinsdottir<sup>5,94</sup>, James F Wilson<sup>42</sup>, Thomas Illig<sup>11b,11e</sup>, Philippe Froguel<sup>7,95</sup>, Cornelia M van Duijn<sup>13</sup>, Kari Stefansson<sup>5,94</sup>, David Altshuler<sup>1,2,3,17,40,93</sup>, Michael Boehnke<sup>4</sup>, Mark I McCarthy<sup>6,14,96</sup>.

## Affiliations

1. Broad Institute of Harvard and Massachusetts Institute of Technology (MIT), Cambridge, Massachusetts 02142, USA
2. Center for Human Genetic Research, Massachusetts General Hospital, 185 Cambridge Street, Boston, Massachusetts 02114, USA
3. Department of Medicine, Harvard Medical School, Boston, Massachusetts 02115, USA
4. Department of Biostatistics, University of Michigan, Ann Arbor, Michigan 48109-2029, USA
5. deCODE Genetics, 101 Reykjavik, Iceland
6. Wellcome Trust Centre for Human Genetics, University of Oxford, Oxford, OX3 7BN, UK
7. CNRS-UMR-8090, Institute of Biology and Lille 2 University, Pasteur Institute, F-59019 Lille, France
8. INSERM UMR915 CNRS ERL3147 F-44007 Nantes, France
9. Bioinformatics Program, University of Michigan, Ann Arbor MI USA 48109
10. Wellcome Trust Sanger Institute, Hinxton, CB10 1HH, UK

11. a: Institute of Epidemiology II, Helmholtz Zentrum Muenchen, 85764 Neuherberg, Germany, b: Research Unit of Molecular Epidemiology, Helmholtz Zentrum Muenchen, 85764 Neuherberg, Germany, c: Institute of Genetic Epidemiology, Helmholtz Zentrum Muenchen, 85764 Neuherberg, Germany, d: Institute of Epidemiology I, Helmholtz Zentrum Muenchen, 85764 Neuherberg, Germany, b: Research Unit of Molecular Epidemiology, Helmholtz Zentrum Muenchen, 85764 Neuherberg, Germany, e: Hannover Unified Biobank, Hannover Medical School, 30625 Hannover, Germany
12. Institute of Medical Informatics, Biometry and Epidemiology, Ludwig-Maximilians-Universität München, 81377 Munich, Germany
13. Department of Epidemiology, Erasmus University Medical Center, P.O. Box 2040, 3000 CA Rotterdam, The Netherlands.
14. Oxford Centre for Diabetes, Endocrinology and Metabolism, University of Oxford, OX3 7LJ, UK
15. Ontario Institute for Cancer Research, 101 College Street, Suite 800, Toronto, Ontario M5G 0A3, Canada
16. Division of Rheumatology, Immunology and Allergy, Brigham and Women's Hospital, Harvard Medical School, Boston, Massachusetts 02115, USA
17. Department of Molecular Biology, Harvard Medical School, Boston, Massachusetts 02115, USA
18. MRC Epidemiology Unit, Institute of Metabolic Science, Addenbrooke's Hospital, Cambridge CB2 0QQ, UK
19. Department of Biostatistics, Harvard School of Public Health, Boston, Massachusetts 02115, USA
20. Department of Biostatistics, Boston University School of Public Health, Boston, Massachusetts 02118, USA
21. National Heart, Lung, and Blood Institute's Framingham Heart Study, Framingham, Massachusetts 01702, USA
22. Department of Nutrition, Harvard School of Public Health, 665 Huntington Ave, Boston, MA 02115, USA
23. Department of Epidemiology, Harvard School of Public Health, 665 Huntington Ave, Boston, MA 02115, USA
24. Channing Laboratory, Dept. of Medicine, Brigham and Women's Hospital and Harvard Medical School, 181 Longwood Ave, Boston, MA 02115, USA
25. Department of Internal Medicine, Erasmus University Medical Centre, PO-Box 2040, 3000 CA Rotterdam, The Netherlands
26. MRC Human Genetics Unit, Institute of Genetics and Molecular Medicine, Western General Hospital, Edinburgh, EH4 2XU, UK
27. INSERM U780, F-94807 Villejuif. France
28. University Paris-Sud, F-91405 Orsay, France
29. Landspítali University Hospital, 101 Reykjavik, Iceland
30. Icelandic Heart Association, 201 Kopavogur, Iceland
31. Division of Endocrinology, Diabetes and Metabolism, Ulm University, 89081 Ulm, Germany
32. The Human Genetics Center and Institute of Molecular Medicine, University of Texas Health Science Center, Houston, Texas 77030, USA
33. National Human Genome Research Institute, National Institute of Health, Bethesda, Maryland 20892, USA
34. R&D Centre, Skaraborg Primary Care, 541 30 Skövde, Sweden
35. Department of Internal Medicine, Catharina Hospital, PO-Box 1350, 5602 ZA Eindhoven, The Netherlands
36. Endocrinology-Diabetology Unit, Corbeil-Essonnes Hospital, F-91100 Corbeil-Essonnes, France
37. Department of Biostatistics and Collaborative Studies Coordinating Center, University of North Carolina at Chapel Hill, Chapel Hill, North Carolina, 27599, USA
38. Diabetes Research Centre, Biomedical Research Institute, University of Dundee, Ninewells Hospital, Dundee DD1 9SY, UK
39. Pharmacogenomics Centre, Biomedical Research Institute, University of Dundee, Ninewells Hospital, Dundee DD1 9SY, UK
40. Department of Genetics, Harvard Medical School, Boston, Massachusetts 02115, USA
41. Division of Endocrinology, Diabetes, and Hypertension, Brigham and Women's Hospital, Harvard Medical School, Boston, Massachusetts 02115, USA
42. Centre for Population Health Sciences, University of Edinburgh, Teviot Place, Edinburgh, EH8 9AG, UK
43. Hagedorn Research Institute, DK-2820 Gentofte, Denmark
44. Centre Hospitalier Universitaire de Poitiers, Endocrinologie Diabetologie, CIC INSERM 0801, INSERM U927, Université de Poitiers, UFR, Médecine Pharmacie, 86021 Poitiers Cedex, France



45. Institute for Clinical Diabetology, German Diabetes Center, Leibniz Center for Diabetes Research at Heinrich Heine University Düsseldorf, 40225 Düsseldorf, Germany
46. Folkhälsan Research Center, FIN-00014 Helsinki, Finland
47. Malmska Municipal Health Center and Hospital, 68601 Jakobstad, Finland
48. Diabetes Research and Wellness Foundation Human Islet Isolation Facility and Oxford Islet Transplant Programme, University of Oxford, Old Road, Headington, Oxford, OX3 7LJ, UK
49. Research Centre for Prevention and Health, Glostrup University Hospital, DK-2600 Glostrup, Denmark
50. Faculty of Health Science, University of Copenhagen, 2200 Copenhagen, Denmark
51. Department of Epidemiology, Johns Hopkins University, Baltimore, Maryland 21287, USA
52. Department of Medicine, and Welch Center for Prevention, Epidemiology, and Clinical Research, Johns Hopkins University, Baltimore, Maryland 21287, USA
53. Department of Medicine, University of Kuopio and Kuopio University Hospital, FIN-70211 Kuopio, Finland
54. Department of General Medical Practice, University of Aarhus, DK-8000 Aarhus, Denmark
55. Department of Internal Medicine, Maxima MC, PO-Box 90052, 5600 PD Eindhoven, The Netherlands
56. Department of Clinical Sciences, Diabetes and Endocrinology Research Unit, University Hospital Malmö, Lund University, 205 02 Malmö, Sweden
57. Department of Endocrinology, Diabetology and Nutrition, Bichat-Claude Bernard University Hospital, Assistance Publique des Hôpitaux de Paris, 75870 Paris Cedex 18, France
58. INSERM U695, Université Paris 7, 75018 Paris, France
59. Institute of Human Genetics, Helmholtz Zentrum Muenchen, 85764 Neuherberg, Germany
60. Institute of Human Genetics, Klinikum rechts der Isar, Technische Universität München, 81675 Muenchen, Germany
61. Nord-Trøndelag Health Study (HUNT) Research Center, Department of Community Medicine and General Practice, Norwegian University of Science and Technology, NO-7491 Trondheim, Norway
62. Genetics of Complex Traits, Institute of Biomedical and Clinical Science, Peninsula Medical School, University of Exeter, Magdalen Road, Exeter EX1 2LU, UK
63. Diabetes Genetics, Institute of Biomedical and Clinical Science, Peninsula Medical School, University of Exeter, Barrack Road, Exeter EX2 5DW, UK
64. Institute of Biometrics and Epidemiology, German Diabetes Center, Leibniz Center for Diabetes Research at Heinrich Heine University Düsseldorf, 40225 Düsseldorf, Germany
65. Department of Human Genetics, McGill University, Montreal H3H 1P3, Canada
66. Department of Medicine, Faculty of Medicine, McGill University, Montreal, H3A 1A4, Canada
67. McGill University and Genome Quebec Innovation Centre, Montreal, H3A 1A4, Canada
68. Department of Metabolic Diseases, Heinrich Heine University Düsseldorf, 40225 Düsseldorf, Germany
69. Department of Endocrinology and Diabetes, Norfolk and Norwich University Hospital NHS Trust, Norwich, NR1 7UY, UK.
70. General Medicine Division, Massachusetts General Hospital, Boston, Massachusetts, USA
71. Institut interrégional pour la Santé (IRSA), F-37521 La Riche, France
72. Department of Medicine, Helsinki University Hospital, University of Helsinki, FIN-00290 Helsinki, Finland
73. Department of Internal Medicine, University Medical Center Utrecht, 3584 CG Utrecht, The Netherlands
74. Molecular Genetics, Medical Biology Section, Department of Pathology and Medical Biology, University Medical Center Groningen and University of Groningen, 9700 RB Groningen, The Netherlands
75. Department of Genetics, University Medical Center Groningen and University of Groningen, 9713 EX Groningen, The Netherlands
76. Department of Physiology and Biophysics, University of Southern California School of Medicine, Los Angeles, California 90033, USA
77. National Institute of Health, Bethesda, Maryland 20892, USA
78. Department of Genetics and Pathology, Rudbeck Laboratory, Uppsala University, S-751 85 Uppsala, Sweden.
79. University of Southern Denmark, DK-5230 Odense, Denmark
80. Centre for Diabetes, Barts and The London School of Medicine and Dentistry, Queen Mary University of London, London E1 2AT, UK
81. Department of Medicine, The Hospital of Levanger, N-7600 Levanger, Norway

82. Department of Genetics, University of North Carolina, Chapel Hill, North Carolina 27599, USA
83. Institute of Genetic Medicine, European Academy Bozen/Bolzano (EURAC), Viale Druso 1, 39100 Bolzano, Italy
84. Croatian Centre for Global Health, Faculty of Medicine, University of Split, Soltanska 2, 21000 Split, Croatia
85. Institute for Clinical Medical Research, University Hospital "Sestre Milosrdnice", Vinogradska 29, 10000 Zagreb, Croatia
86. Department of Chronic Disease Prevention, National Institute for Health and Welfare, Helsinki FIN-00300, Finland,
87. Diabetes Research Group, Institute of Cellular Medicine, Newcastle University, Framlington Place, Newcastle upon Tyne NE2 4HH, UK
88. Department of Preventive Medicine, Keck Medical School, University of Southern California, Los Angeles, CA, 90089-9001, USA
89. Division of Epidemiology and Community Health, University of Minnesota, Minneapolis, Minnesota 55454, USA
90. Department of Biomedical Science, Panum, Faculty of Health Science, University of Copenhagen, 2200 Copenhagen, Denmark
91. Faculty of Health Science, University of Aarhus, DK-8000 Aarhus, Denmark
92. Klinikum Grosshadern, 81377 Munich, Germany
93. Diabetes Unit, Massachusetts General Hospital, Boston, Massachusetts 02144, USA
94. Faculty of Medicine, University of Iceland, 101 Reykjavík, Iceland
95. Genomic Medicine, Imperial College London, Hammersmith Hospital, W12 0NN, London, UK
96. Oxford National Institute for Health Research Biomedical Research Centre, Churchill Hospital, Old Road Headington, Oxford, OX3 7LJ, UK

## Look AHEAD RESEARCH GROUP AT BASELINE

### Clinical Sites

The Johns Hopkins Medical Institutions Frederick Brancati, MD, MHS; Debi Celnik, MS, RD, LD; Jeff Honas, MS; Jeanne Clark, MD, MPH; Jeanne Charleston, RN; Lawrence Cheskin, MD; Kerry Stewart, EdD; Richard Rubin, PhD; Kathy Horak, RD

Pennington Biomedical Research Center George A. Bray, MD; Kristi Rau; Allison Strate, RN; Frank L. Greenway, MD; Donna H. Ryan, MD; Donald Williamson, PhD; Elizabeth Tucker; Brandi Armand, LPN; Mandy Shipp, RD; Kim Landry; Jennifer Perault

The University of Alabama at Birmingham Cora E. Lewis, MD, MSPH; Sheikilya Thomas MPH; Vicki DiLillo, PhD; Monika Safford, MD; Stephen Glasser, MD; Clara Smith, MPH; Cathy Roche, RN; Charlotte Bragg, MS, RD, LD; Nita Webb, MA; Staci Gilbert, MPH; Amy Dobelstein; L. Christie Oden; Trena Johnsey

### Harvard Center

*Massachusetts General Hospital:* David M. Nathan, MD; Heather Turgeon, RN; Kristina P. Schumann, BA; Enrico Cagliero, MD; Kathryn Hayward, MD; Linda Delahanty, MS, RD; Barbara Steiner, EdM; Valerie Goldman, MS, RD; Ellen Anderson, MS, RD; Laurie Bissett, MS, RD; Alan McNamara, BS; Richard Ginsburg, PhD; Virginia Harlan, MSW; Theresa Michel, MS

*Joslin Diabetes Center:* Edward S. Horton, MD; Sharon D. Jackson, MS, RD, CDE; Osama Hamdy, MD, PhD; A. Enrique Caballero, MD; Sarah Ledbury, MEd, RD; Maureen Malloy, BS; Ann Goebel-Fabbri, PhD; Kerry Ovalle, MS, RCEP, CDE; Sarah Bain, BS; Elizabeth Bovaird, BSN, RN; Lori Lambert, MS, RD

*Beth Israel Deaconess Medical Center:* George Blackburn, MD, PhD; Christos Mantzoros, MD, DSc; Ann McNamara, RN; Heather McCormick, RD

University of Colorado Anschutz Medical Campus James O. Hill, PhD; Marsha Miller, MS, RD; Brent Van Dorsten, PhD; Judith Regensteiner, PhD; Holly R. Wyatt, M.D., Ligia Coelho, BS; Paulette Cohrs, RN, BSN; Susan Green; April Hamilton, BS, CCRC; Jere Hamilton, BA; Eugene Leshchinskiy; Michael McDermott, MD; Loretta Rome, TRS; Kristin Wallace, MPH; Terra Worley, BA

Baylor College of Medicine John P. Foreyt, PhD; Rebecca S. Reeves, DrPH, RD; Henry Pownall, PhD; Peter Jones, MD; Ashok Balasubramanyam, MD; Molly Gee, MEd, RD

University of California at Los Angeles School of Medicine Mohammed F. Saad, MD; Ken C. Chiu, MD; Siran Ghazarian, MD; Kati Szamos, RD; Magpuri Perpetua, RD; Michelle Chan, BS; Medhat Botrous

### The University of Tennessee Health Science Center

*University of Tennessee East.* Karen C. Johnson, MD, MPH; Leeann Carmichael, RN; Lynne Lichtermann, RN, BSN

University of Tennessee Downtown. Abbas E. Kitabchi, PhD, MD; Jackie Day, RN; Helen Lambeth, RN, BSN; Debra Force, MS, RD, LDN; Debra Clark, LPN; Andrea Crisler, MT, Donna Green, RN; Gracie Cunningham; Maria Sun, MS, RD, LDN; Robert Kores, PhD; Renate Rosenthal, PhD; and Judith Soberman, MD

University of Minnesota Robert W. Jeffery, PhD; Carolyn Thorson, CCRP; John P. Bantle, MD; J. Bruce Redmon, MD; Richard S. Crow, MD; Jeanne Carls, MEd; Carolyne Campbell; La Donna James; T. Ockenden, RN; Kerrin Brelje, MPH, RD; M. Patricia Snyder, MA, RD; Amy Keranen, MS; Cara Walcheck, BS, RD; Emily Finch, MA; Birgitta I. Rice, MS, RPh, CHES; Vicki A. Maddy, BS, RD; Tricia Skarphol, BS

St. Luke's Roosevelt Hospital Center Xavier Pi-Sunyer, MD; Jennifer Patricio, MS; Jennifer Mayer, MS; Stanley Heshka, PhD; Carmen Pal, MD; Mary Anne Holowaty, MS, CN; Diane Hirsch, RNC, MS, CDE

University of Pennsylvania Thomas A. Wadden, PhD; Barbara J. Maschak-Carey, MSN, CDE; Gary D. Foster, PhD; Robert I. Berkowitz, MD; Stanley Schwartz, MD; Shiriki K. Kumanyika, PhD, RD, MPH; Monica Mullen, MS, RD; Louise Hesson, MSN; Patricia Lipschutz, MSN; Anthony Fabricatore, PhD; Canice Crerand, PhD; Robert Kuehnel, PhD; Ray Carvajal, MS; Renee Davenport; Helen Chomentowski

University of Pittsburgh David E. Kelley, MD; Jacqueline Wesche -Thobaben, RN,BSN,CDE; Lewis Kuller, MD, DrPH.; Andrea Kriska, PhD; Daniel Edmundowicz, MD; Mary L. Klem, PhD, MLIS; Janet Bonk, RN, MPH; Jennifer Rush, MPH; Rebecca Danchenko, BS; Barb Elnyczky, MA; Karen Vujevich, RN-BC, MSN, CRNP; Janet Krulia, RN ,BSN ,CDE; Donna Wolf, MS; Juliet Mancino, MS, RD, CDE, LDN; Pat Harper, MS, RD, LDN; Anne Mathews, MS, RD, LDN

Brown University Rena R. Wing, PhD; Vincent Pera, MD; John Jakicic, PhD; Deborah Tate, PhD; Amy Gorin, PhD; Renee Bright, MS; Pamela Coward, MS, RD; Natalie Robinson, MS, RD; Tammy Monk, MS; Kara Gallagher, PhD; Anna Bertorelli, MBA, RD; Maureen Daly, RN; Tatum Charron, BS; Rob Nicholson, PhD; Erin Patterson, BS; Julie Currin, MD; Linda Foss, MPH; Deborah Robles; Barbara Bancroft, RN, MS; Jennifer Gauvin, BS; Deborah Maier, MS; Caitlin Egan, MS; Suzanne Phelan, PhD; Hollie Raynor, PhD, RD; Don Kieffer, PhD; Douglas Raynor, PhD; Lauren Lessard, BS; Kimberley Chula-Maguire, MS; Erica Ferguson, BS, RD; Richard Carey, BS; Jane Tavares, BS; Heather Chenot, MS; JP Massaro, BS

The University of Texas Health Science Center at San Antonio Steve Haffner, MD; Maria Montez, RN, MSHP, CDE; Connie Mobley, PhD, RD; Carlos Lorenzo, MD

University of Washington / VA Puget Sound Health Care System Steven E. Kahn, MB, ChB; Brenda Montgomery, MS, RN, CDE; Robert H. Knopp, MD; Edward W. Lipkin, MD, PhD; Matthew L. Maciejewski, PhD; Dace L. Trence, MD; Roque M. Murillo, BS; S. Terry Barrett, BS

Southwestern American Indian Center, Phoenix, Arizona and Shiprock, New Mexico William C. Knowler, MD, DrPH; Paula Bolin, RN, MC; Tina Killean, BS; Carol Percy, RN; Rita Donaldson, BSN; Bernadette Todacheenie, EdD; Justin Glass, MD; Sarah Michaels, MD; Jonathan Krakoff, MD; Jeffrey Curtis, MD, MPH; Peter H. Bennett, MB, FRCP; Tina Morgan; Ruby Johnson; Cathy Manus; Janelia Smiley; Sandra Sangster; Shandiin Begay, MPH; Minnie Roanhorse; Didas Fallis, RN; Nancy Scurlock, MSN, ANP; Leigh Shovestull, RD

### **Coordinating Center**

Wake Forest University School of Medicine Mark A. Espeland, PhD; Judy Bahnson, BA; Lynne Wagenknecht, DrPH; David Reboussin, PhD; W. Jack Rejeski, PhD; Wei Lang, PhD; Alain Bertoni, MD, MPH; Mara Vitolins, DrPH; Gary Miller, PhD; Paul Ribisl, PhD; Kathy Dotson, BA; Amelia Hodges, BS; Patricia Hogan, MS; Kathy Lane, BS; Carrie Williams, MA; Christian Speas, BS; Delia S. West, PhD; William Herman, MD, MPH

### **Central Resources Centers**

DXA Reading Center, University of California at San Francisco Michael Nevitt, PhD; Ann Schwartz, PhD; John Shepherd, PhD; Jason Maeda, MPH; Cynthia Hayashi; Michaela Rahorst; Lisa Palermo, MS, MA

Central Laboratory, Northwest Lipid Research Laboratories Santica M. Marcovina, PhD, ScD; Greg Strylewicz, MS

ECG Reading Center, EPICARE, Wake Forest University School of Medicine

Ronald J. Prineas, MD, PhD; Zhu-Ming Zhang, MD; Charles Campbell, AAS, BS; Sharon Hall

Diet Assessment Center, University of South Carolina, Arnold School of Public Health, Center for Research in Nutrition and Health Disparities Elizabeth J Mayer-Davis, PhD; Cecilia Farach, DrPH

**A.**

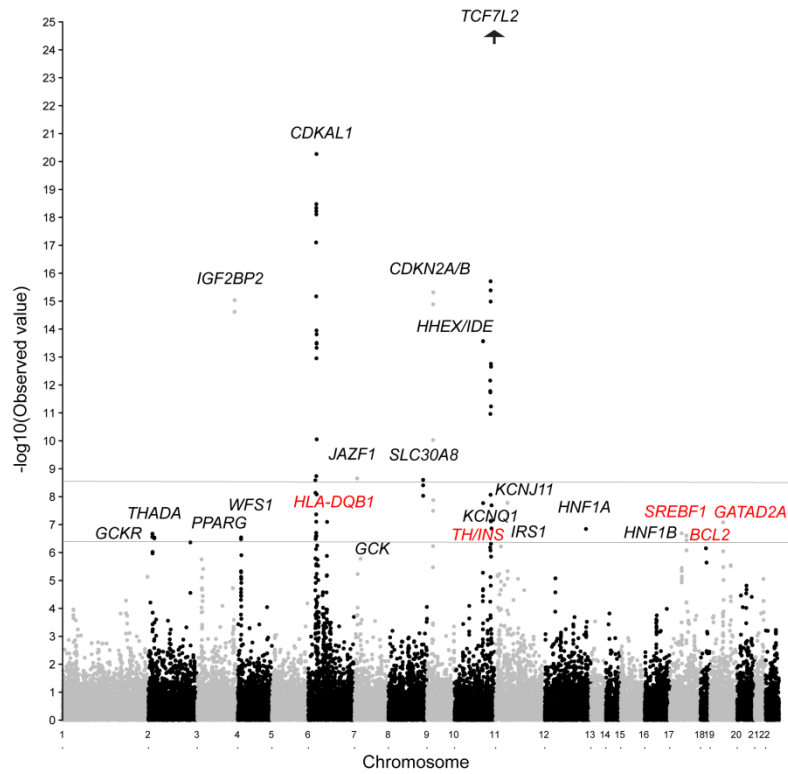

**B.**

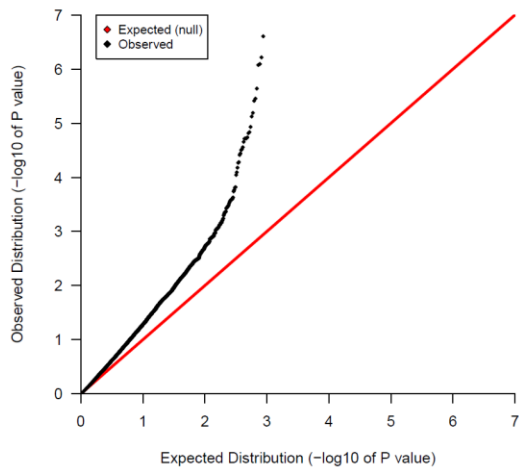

**Figure S1. Summary meta-analysis results for 25 European ancestry IBC array association studies. A.** Manhattan plot highlighting known and novel T2D associated loci. **B.** QQ plot of observed vs. the expected distribution of P-values. Each association study was subjected to genomic-control before meta-analysis. SNPs with MAF < 0.005 were filtered and SNPs with  $r^2 > 0.1$  were pruned for the plot. Lambda after meta-analysis = 1.357, which scales to  $\hat{\lambda}_{1000\text{cases}/1000\text{controls}}$  of 1.07.

A.

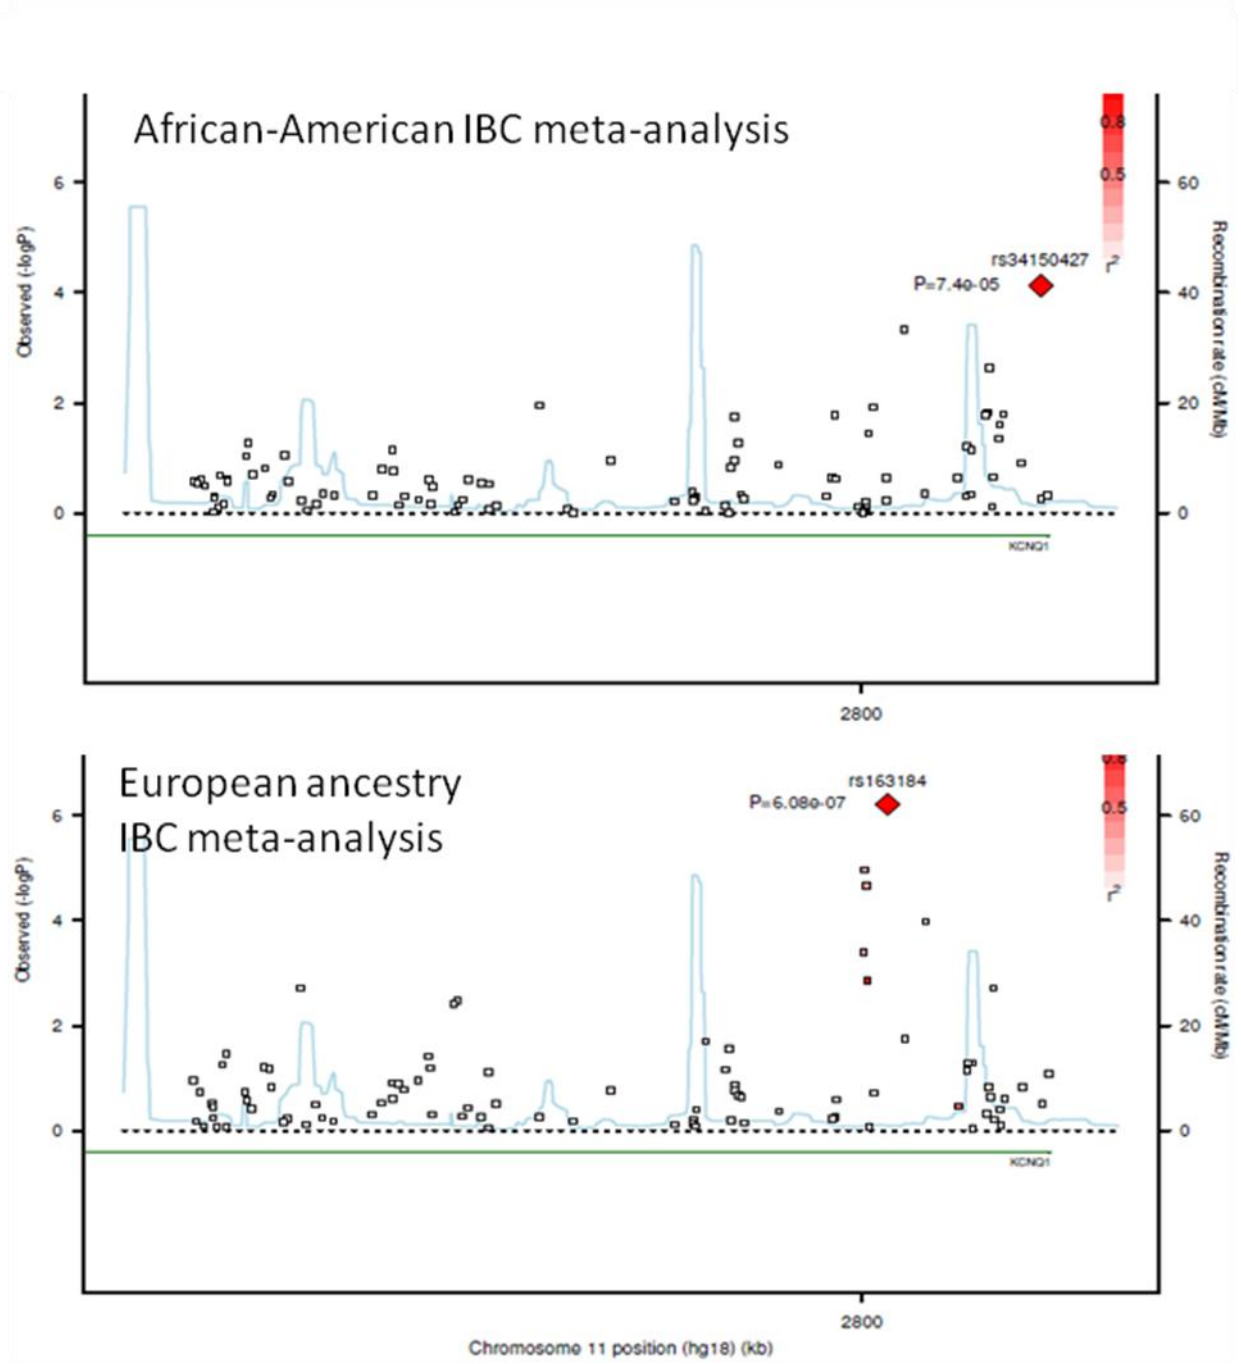

B.

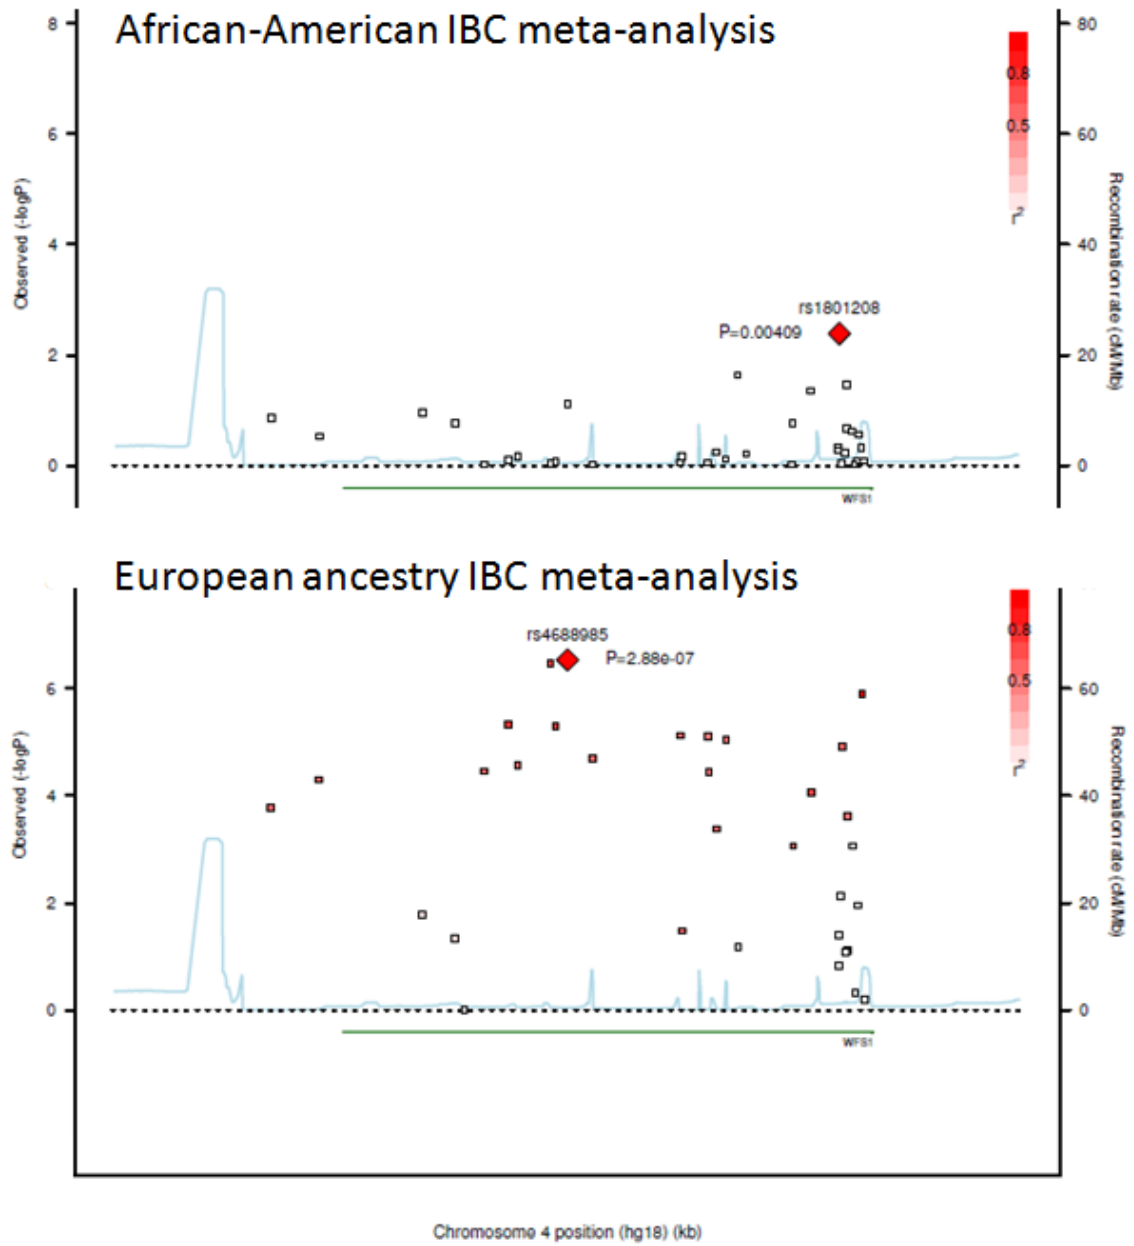



C.

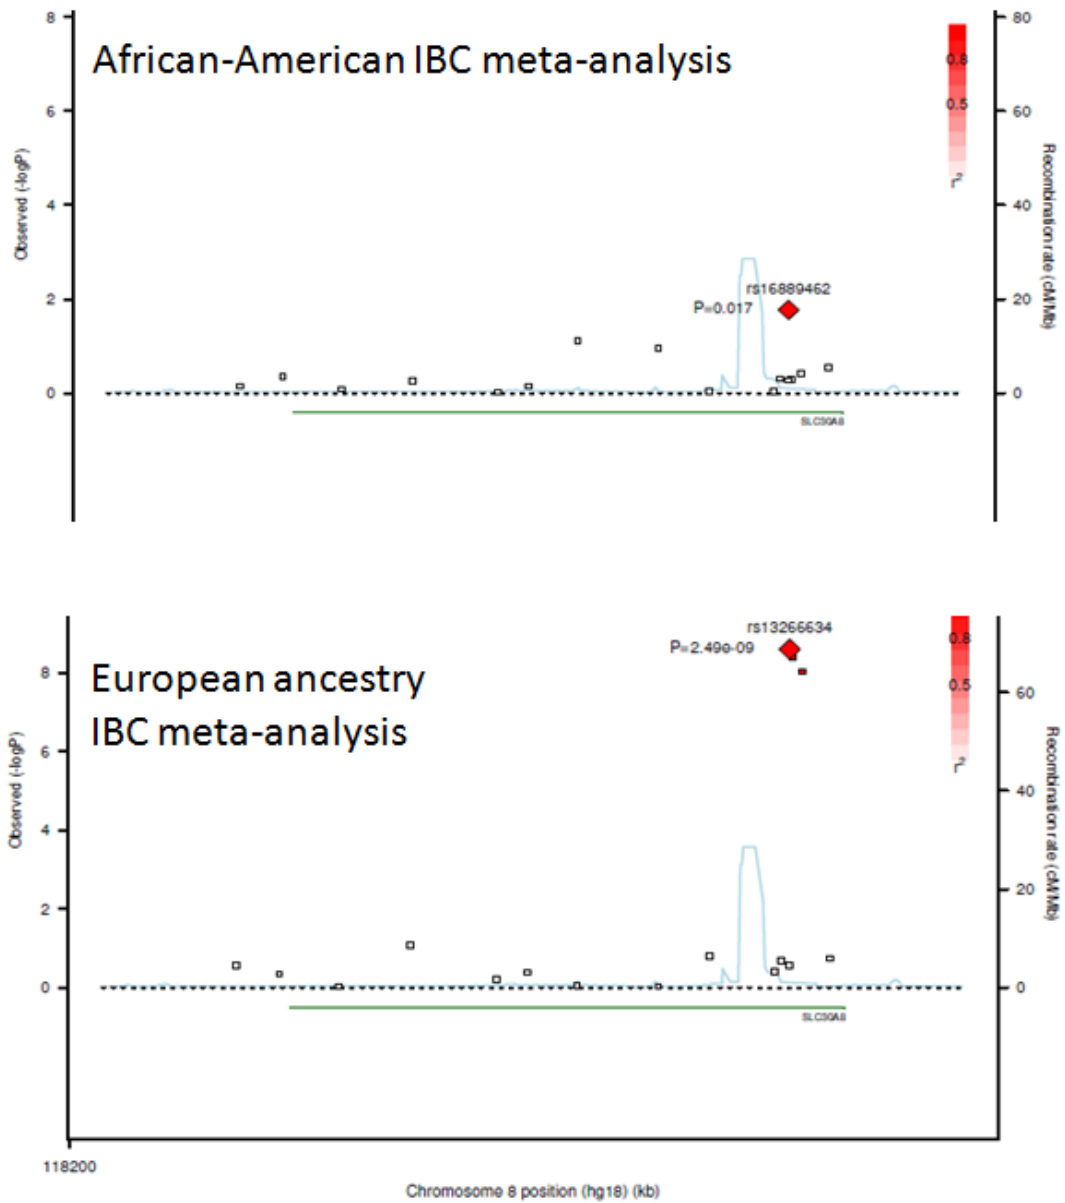

**Figure S2. Regional plots of T2D association signals at missense SNPs observed in meta-analysis of African-American IBC studies that are not observed in European ancestry IBC meta-analysis. A.** rs34150427 (V648I/ V521I) in *KCNQ1* ; **B.** rs1801208 (R456H) in *WFS1* and; **C.** rs16889462 (R324) in *SLC30A8* (adjacent to known SNP rs13266634).

| Chr | Gene Symbol          | N SNPs (v1) | more SNPs (v2) | more SNPs (v3) | index SNP on IBC array for previously associated signal used for genetic risk score |
|-----|----------------------|-------------|----------------|----------------|-------------------------------------------------------------------------------------|
| 1   | <i>HSD11B1</i>       | 12          |                |                |                                                                                     |
| 1   | <i>IL6R</i>          | 42          | 1              |                |                                                                                     |
| 1   | <i>LMNA</i>          | 7           |                |                |                                                                                     |
| 1   | <i>PKLR(1q)</i>      | 5           |                |                |                                                                                     |
| 1   | <i>PTGER3</i>        | 50          |                |                |                                                                                     |
| 1   | <i>USF1</i>          | 27          | 1              |                |                                                                                     |
| 1   | <i>NOTCH2</i>        | 1           | 11             |                | rs10923931                                                                          |
| 1   | <i>ADAM30</i>        |             | 7              |                |                                                                                     |
| 2   | <i>GCKR</i>          | 13          | 1              | 6              | rs780094                                                                            |
| 2   | <i>IRS1</i>          | 31          | 2              |                | rs2943634 ( $r^2=0.815$ to rs7578326)                                               |
| 2   | <i>LPIN1</i>         | 44          | 1              |                |                                                                                     |
| 2   | <i>NEUROD1</i>       | 9           |                |                |                                                                                     |
| 2   | <i>THADA</i>         |             | 27             |                | rs7578597                                                                           |
| 2   | <i>RBMS1</i>         | 1           |                |                | rs6718526 ( $r^2=0.832$ to rs7593730)                                               |
| 2   | <i>ITGB6</i>         | 14          |                |                |                                                                                     |
| 3   | <i>ADIPOQ</i>        | 21          |                | 1              |                                                                                     |
| 3   | <i>PPARG</i>         | 100         | 2              | 3              | rs1801282                                                                           |
| 3   | <i>SLC2A2</i>        | 13          |                |                |                                                                                     |
| 3   | <i>ADAMTS9</i>       | 1           | 5              |                | rs4607103                                                                           |
| 3   | <i>IGF2BP2</i>       | 2           |                |                | rs1470579                                                                           |
| 4   | <i>CPE</i>           | 65          |                | 12             |                                                                                     |
| 4   | <i>WFS1</i>          | 36          |                | 1              | rs1801214                                                                           |
| 6   | <i>CDKAL1</i>        | 349         | 1              | 2              | rs9368222                                                                           |
| 6   | <i>ENPP1</i>         | 31          | 1              |                |                                                                                     |
| 6   | <i>TNF</i>           | 17          |                |                |                                                                                     |
| 6   | <i>VEGFA</i>         | 14          | 2              |                |                                                                                     |
| 7   | <i>CDK5</i>          | 12          |                |                |                                                                                     |
| 7   | <i>CDK6</i>          | 56          | 2              |                |                                                                                     |
| 7   | <i>GCK</i>           | 28          | 1              |                |                                                                                     |
| 7   | <i>JAZF1</i>         |             | 2              |                | rs864745                                                                            |
| 7   | <i>DGKB/TME M195</i> | 2           |                |                |                                                                                     |
| 8   | <i>SLC30A8</i>       | 16          |                |                | rs13266634                                                                          |
| 9   | <i>CDKN2A/B</i>      | 128         |                |                | rs10811661                                                                          |
| 9   | <i>CDKN2B</i>        | 11          | 5              |                |                                                                                     |
| 10  | <i>HHEX</i>          | 7           |                |                | rs5015480                                                                           |
| 10  | <i>IDE</i>           | 16          |                |                |                                                                                     |
| 10  | <i>KIF11</i>         | 10          |                |                |                                                                                     |
| 10  | <i>TCF7L2</i>        | 107         | 2              |                | rs7903146                                                                           |
| 10  | <i>CDC123/CAMK1D</i> |             | 2              |                |                                                                                     |
| 11  | <i>ABCC8</i>         | 44          |                | 1              |                                                                                     |

|    |                             |     |    |    |                                        |
|----|-----------------------------|-----|----|----|----------------------------------------|
| 11 | <i>EXT2</i>                 | 27  | 2  |    |                                        |
| 11 | <i>H19</i>                  | 6   | 1  |    |                                        |
| 11 | <i>IGF2</i>                 | 5   |    |    |                                        |
| 11 | <i>INS</i>                  | 11  |    |    |                                        |
| 11 | <i>KCNJ11</i>               | 11  |    |    | rs5219                                 |
| 11 | <i>LOC387761</i>            | 179 | 6  |    |                                        |
| 11 | <i>TUB</i>                  | 66  |    |    |                                        |
| 11 | <i>11p12<br/>intergenic</i> | 1   |    |    | rs7107246 ( $r^2=0.917$ to rs9300039)  |
| 11 | <i>KCNQ1</i>                | 235 | 1  | 7  | rs231362, rs163184                     |
| 11 | <i>CENTD2</i>               | 1   |    |    | rs613937 ( $r^2=0.86$ to rs1552224)    |
| 11 | <i>MTNR1B</i>               | 8   |    | 9  | rs10830963                             |
| 12 | <i>CDK4</i>                 | 25  |    |    |                                        |
| 12 | <i>TCF1<br/>(HNF1A)</i>     | 13  | 1  | 13 | rs12427353 ( $r^2=0.882$ to rs7957197) |
| 12 | <i>TSPAN8</i>               |     | 17 |    | rs7961581                              |
| 12 | <i>LGR5</i>                 |     | 22 |    |                                        |
| 13 | <i>PDX1</i>                 | 10  |    |    |                                        |
| 15 | <i>ZFAND6</i>               | 1   |    |    | rs2903265 ( $r^2=0.71$ to rs11634397)  |
| 16 | <i>FTO</i>                  | 298 | 3  |    | rs11642841                             |
| 16 | <i>HSD11B2</i>              | 4   | 1  |    |                                        |
| 17 | <i>CDK5R1</i>               | 12  |    |    |                                        |
| 17 | <i>HNF1B</i>                | 55  |    |    | rs4430796                              |
| 20 | <i>CDK5RAP1</i>             | 18  |    |    |                                        |
| 20 | <i>HNF4A</i>                | 67  |    | 22 |                                        |
| 20 | <i>PCK1</i>                 | 16  | 1  |    |                                        |
| 22 | <i>PPARA</i>                | 104 |    | 1  |                                        |
| X  | <i>DUSP9</i>                | 9   |    |    |                                        |

**Table S1. List of Type 2 Diabetes candidate genes and 26 previously associated T2D variants on IBC Array.**

| Study                                 | N Cases/<br>Controls<br>(EA) | N Cases/<br>Controls<br>(AA) | N Cases/<br>Controls<br>(HN) | N Cases/<br>Controls<br>(AN) | Age (mean,<br>sd)                                | Gender<br>(%<br>male)  | BMI<br>(mean, sd)                              | Recruitment<br>design  | Year of<br>collection | Age             | Reference<br>(PMID)       |
|---------------------------------------|------------------------------|------------------------------|------------------------------|------------------------------|--------------------------------------------------|------------------------|------------------------------------------------|------------------------|-----------------------|-----------------|---------------------------|
| ARIC†                                 | 1278/260<br>0                | 762/2256                     | ---                          | ---                          | 62.3 (6.0)                                       | 46.0                   | 28.2 (5.3)                                     | Community-<br>based    | 1985-2006             | 45-64           | 20400780                  |
| ASCOT                                 | 323/853                      | ---                          | ---                          | ---                          | 63.1(8.1)                                        | 81.8                   | 29.1(6.7)                                      | Clinical Trial         | 1998-2000             | 40-79           | 11403364                  |
| BWHHS                                 | 342/3101                     | ---                          | ---                          | ---                          | 68.9(5.5)                                        | 0.0                    | 27.6 (4.9)                                     | Population-<br>based   | 1999-2001             | 60-79           | 16045529                  |
| CARDIA†                               | 22/1366                      | 84/1143                      | ---                          | ---                          | 40.6 (3.5)                                       | 46.9                   | 27.0 (1.8)                                     | Community-<br>based    | 1985-2003             | 18-30           | 20400780                  |
| CCCS                                  | 495/1091                     | ---                          | ---                          | ---                          | 64.0 (9.0)                                       | 70.7                   | 30.6 (5.0)                                     | Clinical Trial         | 2002-2003             | 45-92           | 16531616                  |
| CFS†                                  | 14/223                       | 89/369                       | ---                          | ---                          | 49.5 (14.3)                                      | 44.9                   | 33.5 (9.0)                                     | Community-<br>based    | 1990-2008             | 20-90           | 20400780                  |
| CHS†                                  | 576/3375                     | 180/569                      | ---                          | ---                          | 72.77 (5.59)                                     | 44.0                   | 26.38 (4.50)                                   | Community-<br>based    | 1988-2005             | >65             | 20400780                  |
| CLEAR                                 | 317/1282                     | ---                          | ---                          | ---                          | 67.8, 9.6                                        | 85.4                   | 28.0, 5.5                                      | Case-control           | 2005                  | 37-89           | 16474172                  |
| EPIC-NL                               | 1033/188<br>8                | ---                          | ---                          | ---                          | 52.50 (11.00)                                    | 23.0                   | 27.01 (4.59)                                   | Nested<br>case/control | 1993-1997             | 20-70           | 19483199                  |
| FHS†                                  | 427/6272                     | ---                          | ---                          | ---                          | 49.57 (13.06)                                    | 45.2                   | 27.52 (5.51)                                   | Community-<br>based    | 1948-present          | 20-<br>>80      | 20400780                  |
| INVEST                                | 306/654                      | 119/115                      | 255/347                      | ---                          | 68.75 (9.45);<br>65.93 (10.32);<br>67.02 (10.13) | 54.8;<br>37.1;<br>38.0 | 29.1 2(5.37);<br>30.98 (5.96);<br>28.92 (5.09) | Clinical trial         | 1997-2003             | >50             | 14657064                  |
| JHS†                                  | ---                          | 305/1689                     | ---                          | ---                          | 50.4 (11.6)                                      | 39.4                   | 32.2 (7.7)                                     | Community-<br>based    | 1999-2005             | 35-84           | 20400780                  |
| Look AHEAD<br>cases; ARIC<br>controls | 2793/<br>4124                | ---                          | ---                          | ---                          | 59.6 (6.8);<br>61.9 (6.1)                        | 49.6;<br>46.0          | 36.0 (5.9)<br>27.7 (5.2)                       | Clinical Trial         | 2001-2004             | 45-76;<br>45-64 | 17060218;<br>17363746     |
| KORA                                  | 379/1224                     | ---                          | ---                          | ---                          | 52.6 (10.2)                                      | 56.9                   | 27.6 (4.2)                                     | Nested Case<br>control | 1984-2005             | 24-84           | 16032513<br>&<br>16032514 |
| LURIC                                 | 868/1875                     | ---                          | ---                          | ---                          | 62.8 (10.6)                                      | 69.2                   | 27.4 (4.1)                                     | Population<br>based    | 1997 to 2002          | >18             | 19164808                  |
| MEDAL                                 | 465/4063                     | ---                          | ---                          | ---                          | 62.97 (14.00)                                    | 28.6                   | 30.48 (6.30)                                   | Clinical Trial         | 2002-2006             | 49-92           | 17113426                  |
| MERLIN                                | 799/1131                     | ---                          | ---                          | ---                          | 63.57 (10.75)                                    | 66.3                   | 29.00 (4.93)                                   | Clinical Trial         | 2004-2006             | >18             | 2029892                   |
| MESA†                                 | 239/2047                     | 381/1227                     | 297/874                      | 109/529                      | 67.13 (10.09)                                    | 47.8                   | 27.86 (5.23)                                   | Community-<br>based    | 1999-2009             | 45-84           | 20400780                  |

|               |               |             |           |           |               |      |              |                                                         |                       |       |          |
|---------------|---------------|-------------|-----------|-----------|---------------|------|--------------|---------------------------------------------------------|-----------------------|-------|----------|
| PennCAC       | 838/1274      | ---         | ---       | ---       | 55.61 (10.18) | 65.3 | 32.60 (6.43) | Case-control                                            | 1998-2008             | 18-75 | 15289378 |
| PennCATH      | 237/1092      | ---         | ---       | ---       | 60.01 (11.58) | 67.2 | 29.14 (5.71) | Case-control                                            | 1998-2003             | 28-98 | 17258089 |
| PHFS/CH Study | 519/1617      | ---         | ---       | ---       | 56.64 (13.06) | 68.8 | 29.28 (8.55) | Case-control                                            | 2002-2009 & 2003-2008 | 43-92 | 20124441 |
| PROCARDIS     | 615/5835      | ---         | ---       | ---       | 61.0 (8.8)    | 59.1 | 27.7 (4.6)   | Case Control                                            | 1998-2005             | 20-86 | 1808406  |
| PROMIS        | ---           | ---         | ---       | 636/3022  | 53.3 (10.7)   | 82.5 | 25.2 (4.1)   | Case-Control                                            | 2006-present          | 30-80 | 19404752 |
| SMART         | 102/386       | ---         | ---       | ---       | 58.0 (12.0)   | 59.2 | 27.1 (4.0)   | Patient recruitment                                     | 1996                  | 18-80 | 10608355 |
| UCP           | 479/643       | ---         | ---       | ---       | 64.17 (9.85)  | 73.5 | 27.6 (4.7)   | Nested Case-Control                                     | 2000-2008             | 21-80 | 20712525 |
| WHI           | 271/5259      | 66/327      | 40/189    | 22/153    | 67.9 (6.6)    | 0.0  | 28.4 (6.3)   | Clinical trial and population-based observational study | 1993-1998             | 50-79 | 9492970  |
| WH-II         | 336/4214      | ---         | ---       | ---       | 60.9 (66.0)   | 73.6 | 26.7 (4.3)   | Occupational                                            | 1985-1989             | 35-55 | 1674771  |
| TOTAL         | 14,073/57,489 | 1,986/7,695 | 592/1,410 | 767/3,704 |               |      |              |                                                         |                       |       |          |

**Table S2. Characteristics of T2D case/control studies included in IBC Array meta-analyses.** \*Number of individuals >25years old with T2D and genotype information available for this study. EA denotes Europeans, AA denotes African Americans, HI denotes Hispanics and AN denotes Asians. Abbreviations: Atherosclerosis Risk In Communities (ARIC); British Heart Foundation Family Heart Study; British Women's Heart and Health Study (BWHHS); Coronary Artery Risk Development in Young Adults (CARDIA); Cleveland Clinic CHARISMA Study (CCCS); Cleveland Family Study (CFS); Cardiovascular Health Study (CHS); Carotid Lesion Epidemiology And Risk (CLEAR); European Prospective Investigation into Cancer and Nutrition in the Netherlands (EPIC-NL); Framingham Heart Study (FHS); International Verapamil SR Trandolapril Study (INVEST); Jackson Heart Study (JHS); Action for Health in Diabetes (Look AHEAD) Cooperative Health Research in the Region of Augsburg Study (KORA); Ludwigshafen Risk and Cardiovascular Health Study (LURIC); Multinational Etoricoxib and Diclofenac Arthritis Long-term (MEDAL) program; Metabolic Efficiency With Ranolazine for Less Ischemia in Non-ST-Elevation Acute Coronary Syndromes (MERLIN)-TIMI 36; Multi-Ethnic Study of Atherosclerosis (MESA); University of Pennsylvania Coronary Artery Calcification Study (PennCAC); University of Pennsylvania Catheterization study program (PennCATH); University of Pennsylvania Heart Failure Study (PHFS) and Cincinnati Heart Study (CH Study); Precocious Coronary Artery Disease (PROCARDIS); Pakistan Risk of Myocardial Infarction Study (PROMIS); Second Manifestations of ARterial disease SMART) ; Utrecht Cardiovascular Pharmacogenetics (UCP); Women's Health Initiative (WHI); Whitehall II study (WH-II); †Members of the NHLBI Candidate gene Association Resource (CARE).

| Chr | NCBI 36 position | Candidate gene  | SNP        | Effect Allele | Effect Allele Freq IBC | European Ancestry IBC |             |          |                    | DIAGRAM GWAS meta-analysis |             |          |
|-----|------------------|-----------------|------------|---------------|------------------------|-----------------------|-------------|----------|--------------------|----------------------------|-------------|----------|
|     |                  |                 |            |               |                        | Odds Ratio            | 95% CI      | P        | r <sup>2</sup> (%) | Odds Ratio                 | 95% CI      | P        |
|     |                  |                 |            |               |                        |                       |             |          |                    |                            |             |          |
| 1   | 198298703        | <i>NR5A2</i>    | rs3006246  | A             | 0.261                  | 0.93                  | 0.89 - 0.96 | 5.26E-05 | 0                  | 1.01                       | 0.96 - 1.07 | 6.40E-01 |
| 1   | 240116272        | <i>EXO1</i>     | rs4408133  | C             | 0.361                  | 1.08                  | 1.04 - 1.11 | 7.40E-06 | 0                  | 1.02                       | 0.96 - 1.08 | 6.10E-01 |
| 2   | 21087477         | <i>APOB</i>     | rs533617   | C             | 0.039                  | 1.17                  | 1.08 - 1.26 | 6.18E-05 | 20.9               | 1.03                       | 0.81 - 1.31 | 8.17E-01 |
| 3   | 127308749        | <i>ALDH1L1</i>  | rs1127717  | C             | 0.209                  | 1.08                  | 1.04 - 1.12 | 8.08E-05 | 0                  | 0.99                       | 0.94 - 1.04 | 6.48E-01 |
| 3   | 172217793        | <i>SLC2A2</i>   | rs11924032 | A             | 0.261                  | 0.93                  | 0.89 - 0.96 | 1.87E-05 | 0                  | 0.95                       | 0.91 - 1.00 | 3.31E-02 |
| 4   | 157954125        | <i>PDGFC</i>    | rs6822892  | G             | 0.341                  | 0.94                  | 0.91 - 0.97 | 9.03E-05 | 24.6               | 0.95                       | 0.90 - 0.99 | 2.56E-02 |
| 5   | 174809033        | <i>DRD1</i>     | rs6882300  | T             | 0.017                  | 1.27                  | 1.13 - 1.43 | 6.63E-05 | 0                  | 1.10                       | 0.93 - 1.25 | 2.39E-01 |
| 6   | 32734250         | <i>HLA-DQB1</i> | rs9273363  | A             | 0.27                   | 1.1                   | 1.06 - 1.14 | 7.99E-08 | 16.8               | 1.06                       | 1.01 - 1.10 | 1.64E-02 |
| 7   | 30678486         | <i>CRHR2</i>    | rs2284216  | T             | 0.092                  | 0.87                  | 0.83 - 0.93 | 5.91E-06 | 0                  | 0.98                       | 0.91 - 1.06 | 6.28E-01 |
| 8   | 145607956        | <i>SLC39A4</i>  | rs4925820  | G             | 0.456                  | 1.06                  | 1.03 - 1.10 | 8.88E-05 | 0                  | NA                         | NA          | NA       |
| 10  | 75339196         | <i>C10orf55</i> | rs2227551  | G             | 0.262                  | 0.93                  | 0.90 - 0.97 | 8.13E-05 | 0                  | 0.97                       | 0.92 - 1.01 | 1.30E-01 |
| 11  | 2150416          | <i>TH</i>       | rs10770141 | A             | 0.387                  | 1.07                  | 1.04 - 1.11 | 6.44E-06 | 0                  | 1.05                       | 1.00 - 1.10 | 7.08E-02 |
| 11  | 13364347         | <i>ARNTL</i>    | rs2290035  | T             | 0.462                  | 0.93                  | 0.91 - 0.96 | 1.46E-05 | 14.9               | 1.03                       | 0.99 - 1.07 | 1.66E-01 |
| 11  | 41535933         | NA              | rs7946270  | T             | 0.459                  | 0.93                  | 0.90 - 0.96 | 4.98E-05 | 20.9               | 1.03                       | 0.98 - 1.07 | 2.10E-01 |
| 11  | 49127350         | <i>FOLH1</i>    | rs16906158 | C             | 0.09                   | 1.13                  | 1.07 - 1.19 | 8.75E-06 | 31.8               | 1.07                       | 1.00 - 1.14 | 5.17E-02 |
| 12  | 12766184         | <i>CDKN1B</i>   | rs7330     | C             | 0.396                  | 1.07                  | 1.04 - 1.11 | 8.40E-06 | 0                  | NA                         | NA          | NA       |
| 17  | 17662182         | <i>SREBF1</i>   | rs4925115  | A             | 0.375                  | 1.09                  | 1.05 - 1.20 | 2.04E-07 | 0                  | 1.04                       | 0.99 - 1.08 | 1.01E-01 |
| 18  | 58996864         | <i>BCL2</i>     | rs12454712 | C             | 0.374                  | 0.93                  | 0.90 - 0.96 | 2.29E-06 | 20.6               | NA                         | NA          | NA       |
| 19  | 19471596         | <i>GATAD2A</i>  | rs3794991  | T             | 0.083                  | 1.14                  | 1.08 - 1.20 | 8.95E-07 | 25                 | 1.11                       | 1.04 - 1.17 | 1.55E-03 |
| 19  | 50864118         | <i>GIPR</i>     | rs11671664 | A             | 0.107                  | 1.12                  | 1.07 - 1.18 | 2.86E-06 | 0                  | 1.06                       | 0.98 - 1.14 | 1.71E-01 |
| 20  | 6707115          | <i>BMP2</i>     | rs235768   | A             | 0.38                   | 0.93                  | 0.91 - 0.97 | 3.45E-05 | 0                  | 0.99                       | 0.94 - 1.03 | 4.81E-01 |
| 20  | 25141849         | <i>ENTPD6</i>   | rs6115089  | A             | 0.052                  | 1.15                  | 1.07 - 1.23 | 9.04E-05 | 33.1               | 0.97                       | 0.86 - 1.09 | 6.09E-01 |
| 20  | 42451674         | <i>HNF4A</i>    | rs4812831  | A             | 0.104                  | 1.11                  | 1.06 - 1.16 | 2.12E-05 | 0                  | 1.08                       | 1.01 - 1.17 | 3.36E-02 |
| 20  | 51053708         | <i>TSHZ2</i>    | rs2252098  | T             | 0.461                  | 0.94                  | 0.91 - 0.97 | 3.86E-05 | 0                  | 1.01                       | 0.97 - 1.05 | 6.28E-01 |
| 21  | 42548763         | <i>ABCG1</i>    | rs225378   | A             | 0.459                  | 0.93                  | 0.91 - 0.96 | 8.78E-06 | 27                 | 0.97                       | 0.92 - 1.02 | 2.50E-01 |

Table S3. European Ancestry Index SNPs for top association signals in IBC and replication results in DIAGRAM Meta-analysis of T2D GWAS.

| rs9273363 ( <i>HLA-DQB1</i> )                    |               |                    |                 |              |                                   |
|--------------------------------------------------|---------------|--------------------|-----------------|--------------|-----------------------------------|
| Studies                                          | Allele A freq | OR (95% CI)        | <i>P</i> -value | Direction    | <i>P</i> <sub>heterogeneity</sub> |
| LADA excluded (DCDG, DGI, FUSION, WTCCC)         | 0.2768        | 1.02 (0.96 - 1.09) | 0.49            | +++-         | 0.3097                            |
| LADA not excluded (deCODE, EUROSPAN, ERGO, KORA) | 0.2662        | 1.09 (1.02 - 1.16) | 0.0074          | ++++         | 0.8537                            |
| ALL DIAGRAM studies                              | 0.2714        | 1.06 (1.01 - 1.11) | 0.016           | +++<br>++++  | 0.5083                            |
| rs10770141 ( <i>TH/INS</i> region)               |               |                    |                 |              |                                   |
| Studies                                          | Allele A freq | OR (95% CI)        | <i>P</i> -value | Direction    | <i>P</i> <sub>heterogeneity</sub> |
| LADA excluded (DCDG, DGI, FUSION, WTCCC)         | 0.3417        | 1.16 (1.05 - 1.28) | 0.0036          | +???         | 0.1219                            |
| LADA not excluded (deCODE, EUROSPAN, ERGO, KORA) | 0.3936        | 1.01 (0.95 - 1.07) | 0.7241          | +?-?         | 0.6424                            |
| ALL DIAGRAM studies                              | 0.3797        | 1.05 (1.00 - 1.10) | 0.0708          | +?+?+-<br>?+ | 0.0719<br>6                       |

**Table S4. Meta analysis of most significant HLA-DQB1 and TH/INS region SNPs in DIAGRAM subsamples including and excluding LADA.**

| Gene            | Allele                    | Chr | Position | Effect Allele | Freq IBC | OR (95% CI)        | P        |
|-----------------|---------------------------|-----|----------|---------------|----------|--------------------|----------|
| <i>HLA-DQA1</i> | HLA_DQA1*03               | 6   | 32716285 | G             | 0.18     | 1.14 (1.08 - 1.20) | 2.80E-07 |
| <i>HLA-DQA1</i> | HLA_DQA1*0301             | 6   | 32716285 | G             | 0.18     | 1.14 (1.08 - 1.20) | 2.80E-07 |
| <i>HLA-DQA1</i> | CHR6_POS32717108          | 6   | 32717109 | T             | 0.18     | 1.14 (1.08 - 1.20) | 2.80E-07 |
| <i>HLA-DQA1</i> | CHR6_POS32717120          | 6   | 32717121 | G             | 0.18     | 1.14 (1.08 - 1.20) | 2.80E-07 |
| <i>HLA-DQA1</i> | CHR6_POS32717128          | 6   | 32717129 | G             | 0.18     | 1.14 (1.08 - 1.20) | 2.80E-07 |
| <i>HLA-DQA1</i> | DQA1_AA49_E2_32717128     | 6   | 32717129 | S             | 0.18     | 1.14 (1.08 - 1.20) | 2.80E-07 |
| <i>HLA-DQA1</i> | DQA1_AA70_E2_32717191_Q   | 6   | 32717192 | G             | 0.18     | 1.14 (1.08 - 1.20) | 2.80E-07 |
| <i>HLA-DQA1</i> | CHR6_POS32717277_G        | 6   | 32717278 | G             | 0.18     | 1.14 (1.08 - 1.20) | 2.80E-07 |
| <i>HLA-DQA1</i> | DQA1_AA99_E2_32717278_V   | 6   | 32717279 | G             | 0.18     | 1.14 (1.08 - 1.20) | 2.80E-07 |
| <i>HLA-DQA1</i> | CHR6_POS32718379          | 6   | 32718380 | A             | 0.18     | 1.14 (1.08 - 1.20) | 2.80E-07 |
| <i>HLA-DQA1</i> | DQA1_AA210_E4_32718380    | 6   | 32718381 | T             | 0.18     | 1.14 (1.08 - 1.20) | 2.80E-07 |
| <i>HLA-DRB1</i> | HLA_DRB1*04               | 6   | 32660043 | G             | 0.168    | 1.14 (1.08 - 1.20) | 3.57E-07 |
| <i>HLA-DRB1</i> | CHR6_POS32665482          | 6   | 32665483 | A             | 0.168    | 1.14 (1.08 - 1.20) | 3.93E-07 |
| <i>HLA-DRB1</i> | DRB1_AA63_E2_32660049     | 6   | 32660050 | H             | 0.168    | 1.14 (1.08 - 1.20) | 4.01E-07 |
| <i>HLA-DRB1</i> | CHR6_POS32660050          | 6   | 32660051 | G             | 0.168    | 1.14 (1.08 - 1.20) | 4.01E-07 |
| <i>HLA-DRB1</i> | DRB1_AA7_E1_32665481      | 6   | 32665482 | F             | 0.168    | 1.14 (1.08 - 1.20) | 4.09E-07 |
| <i>HLA-DRB1</i> | DRB1_AA43_E2_32660109_H   | 6   | 32660110 | G             | 0.168    | 1.14 (1.08 - 1.20) | 4.31E-07 |
| <i>HLA-DRB1</i> | CHR6_POS32660110_G        | 6   | 32660111 | G             | 0.168    | 1.14 (1.08 - 1.20) | 4.31E-07 |
| <i>HLA-DRB1</i> | CHR6_POS32660111          | 6   | 32660112 | T             | 0.168    | 1.14 (1.08 - 1.20) | 4.31E-07 |
| <i>HLA-DRB1</i> | CHR6_POS32657591_A        | 6   | 32657592 | G             | 0.168    | 1.14 (1.08 - 1.20) | 4.77E-07 |
| <i>HLA-DRB1</i> | DRB1_AA126_E3_32657590_Y  | 6   | 32657591 | G             | 0.168    | 1.14 (1.08 - 1.20) | 4.83E-07 |
| <i>HLA-DRB1</i> | DRB1_AA210_E3_32657338    | 6   | 32657339 | L             | 0.168    | 1.14 (1.08 - 1.20) | 5.06E-07 |
| <i>HLA-DRB1</i> | CHR6_POS32657339          | 6   | 32657340 | G             | 0.168    | 1.14 (1.08 - 1.20) | 5.06E-07 |
| <i>HLA-DRB1</i> | HLA_DRB1*0401             | 6   | 32660043 | G             | 0.102    | 1.17 (1.10 - 1.24) | 5.70E-07 |
| <i>HLA-DRB1</i> | DRB1_AA126_E3_32657590_YE | 6   | 32657591 | G             | 0.281    | 1.11 (1.07 - 1.16) | 9.71E-07 |
| <i>HLA-DRB1</i> | DRB1_AA126_E3_32657590_HQ | 6   | 32657591 | A             | 0.281    | 1.11 (1.07 - 1.16) | 9.71E-07 |
| <i>HLA-DRB1</i> | CHR6_POS32657591_G        | 6   | 32657592 | A             | 0.281    | 1.11 (1.07 - 1.16) | 9.71E-07 |
| <i>HLA-DRB1</i> | CHR6_POS32656559          | 6   | 32656560 | G             | 0.281    | 1.11 (1.07 - 1.16) | 1.02E-06 |
| <i>HLA-DRB1</i> | DRB1_AA41_E2_32660115_VD  | 6   | 32660116 | G             | 0.189    | 1.13 (1.07 - 1.18) | 1.62E-06 |
| <i>HLA-DRB1</i> | DRB1_AA101_E2_32659935_K  | 6   | 32659936 | G             | 0.239    | 1.12 (1.07 - 1.17) | 1.65E-06 |
| <i>HLA-DRB1</i> | DRB1_AA43_E2_32660109_HF  | 6   | 32660110 | G             | 0.302    | 1.11 (1.06 - 1.16) | 1.66E-06 |
| <i>HLA-DRB1</i> | CHR6_POS32660115_AT       | 6   | 32660116 | G             | 0.302    | 1.11 (1.06 - 1.16) | 1.66E-06 |
| <i>HLA-DRB1</i> | CHR6_POS32660115_CG       | 6   | 32660116 | A             | 0.302    | 1.11 (1.06 - 1.16) | 1.66E-06 |
| <i>HLA-DRB1</i> | DRB1_AA41_E2_32660115_VLD | 6   | 32660116 | G             | 0.302    | 1.11 (1.06 - 1.16) | 1.66E-06 |
| <i>HLA-DRB1</i> | DRB1_AA41_E2_32660115_GSP | 6   | 32660116 | A             | 0.302    | 1.11 (1.06 - 1.15) | 1.66E-06 |
| <i>C6orf10</i>  | rs2395153                 | 6   | 32453574 | G             | 0.391    | 1.10 (1.06 - 1.15) | 1.69E-06 |
| <i>BTNL2</i>    | rs4424066                 | 6   | 32462407 | G             | 0.419    | 1.10 (1.06 - 1.14) | 3.09E-06 |
| <i>BTNL2</i>    | rs2076529                 | 6   | 32471934 | C             | 0.419    | 1.10 (1.06 - 1.14) | 3.19E-06 |
| <i>HLA-DRB5</i> | rs5020946                 | 6   | 32558068 | G             | 0.418    | 1.10 (1.06 - 1.14) | 3.22E-06 |
| <i>BTNL2</i>    | rs2076530                 | 6   | 32471795 | C             | 0.428    | 1.10 (1.05 - 1.14) | 3.28E-06 |
| <i>BTNL2</i>    | rs3817973                 | 6   | 32469090 | T             | 0.419    | 1.10 (1.06 - 1.14) | 3.32E-06 |
| <i>HLA-DRB1</i> | DRB1_AA41_E2_32660115_V   | 6   | 32660116 | G             | 0.177    | 1.12 (1.07 - 1.18) | 5.00E-06 |
| <i>HLA-DRB1</i> | CHR6_POS32660115_A        | 6   | 32660116 | G             | 0.29     | 1.10 (1.06 - 1.15) | 5.28E-06 |
| <i>HLA-DRB1</i> | DRB1_AA41_E2_32660115_VL  | 6   | 32660116 | G             | 0.29     | 1.10 (1.06 - 1.15) | 5.28E-06 |



| Gene            | Allele                 | Chr | Position | Effect Allele | Freq IBC | OR (95% CI)        | P        |
|-----------------|------------------------|-----|----------|---------------|----------|--------------------|----------|
| <i>HLA-DRB1</i> | CHR6_POS32657518       | 6   | 32657519 | T             | 0.177    | 1.12 (1.07 - 1.18) | 5.46E-06 |
| <i>HLA-DRB1</i> | DRB1_AA150_E3_32657518 | 6   | 32657519 | N             | 0.177    | 1.12 (1.07 - 1.18) | 5.46E-06 |
| <i>HLA-DRB1</i> | rs2516049              | 6   | 32678379 | C             | 0.304    | 1.10 (1.05 - 1.15) | 8.98E-06 |
| <i>HLA-DRB1</i> | DRB1_AA134_E3_32657566 | 6   | 32657567 | A             | 0.305    | 1.10 (1.05 - 1.15) | 1.02E-05 |

**Table S5. Imputation of HLA-alleles in 10,636 cases and 38,063 controls from European ancestry IBC studies and association with T2D.**

| Gene               | SNP        | Ch<br>r | Position    | Effect<br>Allele | Effect<br>Allele<br>Freq<br>IBC | Original Results                |          | Conditional Results              |          | $r^2$ with lead<br>SNP |
|--------------------|------------|---------|-------------|------------------|---------------------------------|---------------------------------|----------|----------------------------------|----------|------------------------|
|                    |            |         |             |                  |                                 | (14,073 cases, 57,489 controls) |          | (10,636 cases & 38,063 controls) |          |                        |
|                    |            |         |             |                  |                                 | OR (95% CI)                     | P        | OR (95% CI)                      | P        |                        |
| <i>SLC39A4</i>     | rs4925820  | 8       | 145,607,956 | G                | 0.456                           | 1.06 (1.03 - 1.10)              | 8.88E-05 |                                  |          |                        |
|                    | rs4977219  | 8       | 145,487,506 | C                | 0.509                           | 1.00 (0.97 - 1.03)              | 7.58E-01 | 1.08 (1.04 - 1.11)               | 2.53E-05 | 0.001                  |
| <i>NA/LRRC4C</i>   | rs7946270  | 11      | 41,535,933  | T                | 0.459                           | 0.93 (0.90 - 0.96)              | 4.98E-05 |                                  |          |                        |
|                    | rs7944293  | 11      | 41,547,494  | C                | 0.001                           | 1.68 (1.01 - 2.82)              | 4.78E-02 | 1.94 (1.81 - 1.98)               | 3.06E-06 |                        |
| <i>ENTPD6</i>      | rs6115089  | 20      | 25,141,849  | A                | 0.052                           | 1.15 (1.07 - 1.23)              | 9.04E-05 |                                  |          |                        |
|                    | rs2073077  | 20      | 25,143,913  | C                | 0.151                           | 0.95 (0.91 - 0.99)              | 2.07E-02 | 0.90 (0.84 - 0.96)               | 3.75E-04 | 0.002                  |
| <i>PDGFC</i>       | rs6822892  | 4       | 157,954,125 |                  | 0.341                           | 0.94 (0.91 - 0.97)              | 9.03E-05 |                                  |          |                        |
|                    | rs7682653  | 4       | 157,914,308 | A                | 0.001                           | 4.32 (1.26 - 14.78)             | 1.72E-01 | 16.24 (3.62 - 72.94)             | 2.76E-04 |                        |
| <i>GIPR</i>        | rs11671664 | 19      | 50,864,118  | A                | 0.107                           | 1.12 (1.07 - 1.18)              | 2.86E-06 |                                  |          |                        |
|                    | rs8109951  | 19      | 50,981,343  | T                | 0.365                           | 1.03 (1.00 - 1.07)              | 4.70E-02 | 1.07 (1.03 - 1.11)               | 5.09E-04 | 0.028                  |
| <i>HNF1A/P2RX7</i> | rs1800574  | 12      | 119,901,247 | T                | 0.029                           | 1.28 (1.17 - 1.40)              | 1.43E-07 |                                  |          |                        |
|                    | rs208297   | 12      | 120,086,410 | T                | 0.001                           | 5.63 (1.62 - 19.59)             | 6.62E-03 | 27.11 (4.71 - 156.05)            | 2.20E-04 | NA                     |
| <i>CENTD2</i>      | rs613937   | 11      | 72,152,487  | G                | 0.172                           | 0.92 (0.88 - 0.95)              | 2.23E-05 |                                  |          |                        |
|                    | rs615703   | 11      | 72,152,880  | A                | 0.001                           | 1.77 (1.03 - 3.02)              | 3.78E-02 | 3.44 (1.63 - 7.28)               | 1.21E-03 | 0.051                  |

**Table S6. Loci with  $P < 1.0E-04$  in IBC meta-analysis and significant locus-specific evidence of independent T2D association signals.**

| Chr       | Candidate gene       | Lead SNP on array | Effect Allele | Caucasian IBC<br>(14,073 cases, 57,489 controls) |                 | African American IBC<br>(1,986 cases & 7,695 controls) |                 | Hispanic IBC<br>(592 cases & 1,410 controls) |                 | Asian IBC<br>(767 cases & 3,704 controls) |                 | Multi-ethnic IBC<br>(17,418 cases & 70,298 controls) |                 |                |
|-----------|----------------------|-------------------|---------------|--------------------------------------------------|-----------------|--------------------------------------------------------|-----------------|----------------------------------------------|-----------------|-------------------------------------------|-----------------|------------------------------------------------------|-----------------|----------------|
|           |                      |                   |               | OR (95% CI)                                      | P               | OR (95% CI)                                            | P               | OR (95% CI)                                  | P               | OR (95% CI)                               | P               | OR (95% CI)                                          | P               | I <sup>2</sup> |
| 10        | <i>TCF7L2</i>        | rs7903146         | T             | 1.44<br>(1.40 - 1.49)                            | 1.21E-109       | 1.37<br>(1.27 - 1.49)                                  | 5.06E-15        | 1.16<br>(0.98-1.36)                          | 7.81E-02        | 1.31<br>(1.16 - 1.48)                     | 1.10E-05        | 1.41<br>(1.37 - 1.45)                                | 5.28E-125       | 41.3           |
| 6         | <i>CDKAL1</i>        | rs9368222         | A             | 1.18<br>(1.14 - 1.22)                            | 5.37E-21        | 1.03<br>(0.94 - 1.13)                                  | 5.43E-01        | 1.14<br>(0.96-1.35)                          | 1.34E-01        | 1.18<br>(1.00 - 1.39)                     | 4.38E-02        | 1.14<br>(1.11 - 1.18)                                | 2.49E-17        | 24.9           |
| 9         | <i>CDKN2A/B</i>      | rs10811661        | C             | 0.84<br>(0.81 - 0.88)                            | 4.83E-16        | 0.92<br>(0.80 - 1.09)                                  | 3.10E-01        | 0.87<br>(0.70-1.07)                          | 1.89E-01        | 0.85<br>(0.73 - 1.00)                     | 5.25E-02        | 0.86<br>(0.82 - 0.89)                                | 2.80E-15        | 16             |
| 3         | <i>IGF2BP2</i>       | rs1470579         | C             | 1.14<br>(1.10 - 1.18)                            | 9.19E-16        | 1.06<br>(0.98 - 1.16)                                  | 1.64E-01        | 1.06<br>(0.91-1.24)                          | 4.62E-01        | 1.10<br>(0.98 - 1.23)                     | 9.77E-02        | 1.12<br>(1.09 - 1.15)                                | 4.55E-15        | 14.1           |
| 7         | <i>JAZF1</i>         | rs864745          | C             | 0.90<br>(0.88 - 0.93)                            | 2.22E-09        | 0.88<br>(0.81 - 0.97)                                  | 3.05E-03        | 0.97<br>(0.83-1.12)                          | 6.54E-01        | 0.83<br>(0.66 - 1.04)                     | 1.05E-01        | 0.90<br>(0.88 - 0.93)                                | 1.42E-11        | 21.5           |
| 10        | <i>HHEX/IDE</i>      | rs5015480         | T             | 0.89<br>(0.86 - 0.91)                            | 2.68E-14        | 0.97<br>(0.90 - 1.04)                                  | 3.54E-01        | 0.98<br>(0.85-1.13)                          | 7.83E-01        | 1.00<br>(0.89 - 1.12)                     | 9.69E-01        | 0.91<br>(0.89 - 0.94)                                | 4.47E-11        | 28.3           |
| 8         | <i>SLC30A8</i>       | rs13266634        | T             | 0.90<br>(0.87 - 0.93)                            | 2.49E-09        | 0.96<br>(0.84 - 1.10)                                  | 5.32E-01        | 0.87<br>(0.73-1.03)                          | 1.05E-01        | 0.86<br>(0.75 - 0.98)                     | 2.42E-02        | 0.90<br>(0.88 - 0.93)                                | 2.71E-10        | 19.5           |
| 11        | <i>KCNJ11</i>        | rs5215            | C             | 1.09<br>(1.06 - 1.13)                            | 1.65E-08        | 1.10<br>(0.97 - 1.25)                                  | 1.25E-01        | 1.10<br>(0.94-1.28)                          | 2.39E-01        | 1.16<br>(1.03 - 1.31)                     | 1.21E-02        | 1.09<br>(1.06 - 1.13)                                | 1.03E-09        | 0.4            |
| <b>18</b> | <b><i>BCL2</i></b>   | <b>rs12454712</b> | <b>C</b>      | <b>0.93<br/>(0.90 - 0.96)</b>                    | <b>2.29E-06</b> | <b>0.96<br/>(0.88 - 1.05)</b>                          | <b>3.39E-01</b> | <b>0.91<br/>(0.78-1.06)</b>                  | <b>2.32E-01</b> | <b>0.88<br/>(0.79 - 0.99)</b>             | <b>3.23E-02</b> | <b>0.92<br/>(0.90 - 0.95)</b>                        | <b>2.14E-08</b> | <b>0</b>       |
| 12        | <i>HNF1A</i>         | rs1800574         | T             | 1.28<br>(1.17 - 1.40)                            | 1.43E-07        | 1.15<br>(0.72 - 1.86)                                  | 5.57E-01        | 1.58<br>(0.84-2.98)                          | 1.57E-01        | 1.16<br>(0.91 - 1.48)                     | 2.34E-01        | 1.27<br>(1.16 - 1.38)                                | 3.57E-08        | 0              |
| 17        | <i>HNF1B</i>         | rs4430796         | G             | 1.08<br>(1.05 - 1.12)                            | 2.48E-07        | 1.02<br>(0.94 - 1.15)                                  | 6.06E-01        | 1.04<br>(0.90-1.21)                          | 5.66E-01        | 1.11<br>(0.99 - 1.25)                     | 6.84E-02        | 1.07<br>(1.04 - 1.10)                                | 9.71E-07        | 14.2           |
| <b>17</b> | <b><i>SREBF1</i></b> | <b>rs4925115</b>  | <b>A</b>      | <b>1.09<br/>(1.05 - 1.20)</b>                    | <b>2.04E-07</b> | <b>1.05<br/>(0.97 - 1.14)</b>                          | <b>2.17E-01</b> | <b>0.97<br/>(0.84-1.12)</b>                  | <b>6.95E-01</b> | <b>1.06<br/>(0.94 - 1.20)</b>             | <b>3.00E-01</b> | <b>1.07<br/>(1.04 - 1.10)</b>                        | <b>1.08E-06</b> | <b>0</b>       |
| 2         | <i>GCKR</i>          | rs780094          | T             | 0.92<br>(0.89 - 0.95)                            | 2.12E-07        | 0.98<br>(0.89 - 1.11)                                  | 6.92E-01        | 1.01<br>(0.87-1.17)                          | 9.19E-01        | 0.98<br>(0.87 - 1.12)                     | 8.02E-01        | 0.93<br>(0.91 - 0.96)                                | 1.24E-06        | 33.5           |
| 11        | <i>IRS1 region</i>   | rs2943634         | A             | 0.92<br>(0.89 - 0.95)                            | 4.32E-07        | 0.96<br>(0.89 - 1.04)                                  | 3.25E-01        | 0.89<br>(0.75-1.05)                          | 1.81E-01        | 1.01<br>(0.89 - 1.15)                     | 8.86E-01        | 0.93<br>(0.91 - 0.96)                                | 1.25E-06        | 20.5           |
| 11        | <i>KCNQ1</i>         | rs163184          | G             | 1.08<br>(1.05 - 1.11)                            | 6.08E-07        | 0.97<br>(0.89 - 1.08)                                  | 5.87E-01        | 1.08<br>(0.94-1.25)                          | 2.71E-01        | 1.03<br>(0.92 - 1.16)                     | 5.83E-01        | 1.07<br>(1.04 - 1.10)                                | 3.53E-06        | 1.3            |
| 3         | <i>PPARG</i>         | rs7649970         | T             | 0.9<br>(0.86 - 0.94)                             | 7.87E-06        | 1.04<br>(0.94 - 1.14)                                  | 4.72E-01        | 0.78<br>(0.61-0.98)                          | 3.47E-02        | 0.83<br>(0.70 - 0.99)                     | 3.82E-02        | 0.91<br>(0.87 - 0.95)                                | 4.54E-06        | 0              |

| Chr | Candidate gene  | Lead SNP on array | Effect Allele | Caucasian IBC<br>(14,073 cases, 57,489 controls) |                 | African American IBC<br>(1,986 cases & 7,695 controls) |                 | Hispanic IBC<br>(592 cases & 1,410 controls) |                 | Asian IBC<br>(767 cases & 3,704 controls) |                 | Multi-ethnic IBC<br>(17,418 cases & 70,298 controls) |                 |                |
|-----|-----------------|-------------------|---------------|--------------------------------------------------|-----------------|--------------------------------------------------------|-----------------|----------------------------------------------|-----------------|-------------------------------------------|-----------------|------------------------------------------------------|-----------------|----------------|
|     |                 |                   |               | OR (95% CI)                                      | P               | OR (95% CI)                                            | P               | OR (95% CI)                                  | P               | OR (95% CI)                               | P               | OR (95% CI)                                          | P               | I <sup>2</sup> |
| 11  | <i>TH/INS</i>   | rs10770141        | A             | <b>1.07</b><br>(1.04 - 1.11)                     | <b>6.44E-06</b> | <b>1.04</b><br>(0.96 - 1.11)                           | <b>3.55E-01</b> | <b>1.12</b><br>(0.97-1.30)                   | <b>1.32E-01</b> | <b>1.07</b><br>(0.94 - 1.22)              | <b>3.03E-01</b> | <b>1.07</b><br>(1.04 - 1.09)                         | <b>4.96E-06</b> | <b>8.3</b>     |
| 2   | <i>THADA</i>    | rs7578597         | C             | 0.86<br>(0.82 - 0.91)                            | 2.91E-07        | 0.98<br>(0.90 - 1.07)                                  | 5.80E-01        | 0.83<br>(0.64-1.07)                          | 1.44E-01        | 1.16<br>(0.88 - 1.54)                     | 2.98E-01        | 0.90<br>(0.86 - 0.95)                                | 9.67E-06        | 40.2           |
| 19  | <i>GIPR</i>     | rs11671664        | A             | <b>1.12</b><br>(1.07 - 1.18)                     | <b>2.86E-06</b> | <b>1.00</b><br>(0.89 - 1.12)                           | <b>9.62E-01</b> | <b>1.21</b><br>(0.95-1.53)                   | <b>1.26E-01</b> | <b>1.02</b><br>(0.87 - 1.21)              | <b>7.74E-01</b> | <b>1.10</b><br>(1.05 - 1.14)                         | <b>1.13E-05</b> | <b>0</b>       |
| 19  | <i>GATAD2A</i>  | rs3794991         | T             | <b>1.14</b><br>(1.08 - 1.20)                     | <b>8.95E-07</b> | <b>0.99</b><br>(0.85 - 1.14)                           | <b>8.63E-01</b> | <b>1.27</b><br>(0.95-1.69)                   | <b>1.06E-01</b> | <b>0.99</b><br>(0.82 - 1.20)              | <b>9.36E-01</b> | <b>1.11</b><br>(1.06 - 1.16)                         | <b>1.68E-05</b> | <b>13.4</b>    |
| 11  | <i>CENTD2</i>   | rs613937          | G             | 0.92<br>(0.88 - 0.95)                            | 2.23E-05        | 0.97<br>(0.89 - 1.04)                                  | 3.67E-01        | 0.86<br>(0.70-1.07)                          | 1.81E-01        | 0.91<br>(0.79 - 1.04)                     | 1.67E-01        | 0.93<br>(0.90 - 0.96)                                | 2.04E-05        | 9.5            |
| 11  | <i>FOLH1</i>    | rs16906158        | C             | <b>1.13</b><br>(1.07 - 1.19)                     | <b>8.75E-06</b> | <b>0.99</b><br>(0.90 - 1.07)                           | <b>7.31E-01</b> | <b>1.10</b><br>(0.89-1.35)                   | <b>3.87E-01</b> | <b>1.12</b><br>(0.98 - 1.28)              | <b>9.16E-02</b> | <b>1.09</b><br>(1.05 - 1.14)                         | <b>3.11E-05</b> | <b>26.8</b>    |
| 3   | <i>SLC2A2</i>   | rs11924032        | A             | <b>0.93</b><br>(0.89 - 0.96)                     | <b>1.87E-05</b> | <b>1.01</b><br>(0.93 - 1.09)                           | <b>8.55E-01</b> | <b>0.88</b><br>(0.75-1.03)                   | <b>1.22E-01</b> | <b>0.98</b><br>(0.87 - 1.11)              | <b>7.77E-01</b> | <b>0.94</b><br>(0.91 - 0.97)                         | <b>4.72E-05</b> | <b>0</b>       |
| 3   | <i>PPARG</i>    | rs1797912         | A             | 1.06<br>(1.03 - 1.09)                            | 5.48E-05        | 0.81<br>(0.65 - 1.01)                                  | 6.12E-02        | 1.15<br>(0.97-1.36)                          | 1.04E-01        | 0.98<br>(0.85 - 1.14)                     | 6.45E-01        | 1.06<br>(1.03 - 1.09)                                | 7.08E-05        | 8.8            |
| 4   | <i>WFS1</i>     | rs4688985         | A             | 0.91<br>(0.88 - 0.95)                            | 2.88E-07        | 1.12<br>(0.99 - 1.26)                                  | 7.82E-02        | 0.95<br>(0.79-1.15)                          | 6.03E-01        | 0.84<br>(0.71 - 1.00)                     | 5.25E-02        | 0.94<br>(0.91 - 0.97)                                | 1.31E-04        | 44.7           |
| 11  | <i>KCNQ1</i>    | rs231362          | A             | 0.93<br>(0.90 - 0.96)                            | 5.90E-06        | 0.96<br>(0.88 - 1.05)                                  | 3.53E-01        | 1.09<br>(0.93-1.26)                          | 2.90E-01        | 0.98<br>(0.85 - 1.11)                     | 7.11E-01        | 0.95<br>(0.92 - 0.97)                                | 1.57E-04        | 18.7           |
| 12  | <i>HMG2</i>     | rs9668162         | G             | <b>0.97</b><br>(0.90 - 1.06)                     | <b>5.17E-01</b> | <b>1.26</b><br>(1.15 - 1.37)                           | <b>2.41E-07</b> | <b>1.21</b><br>(0.97-1.51)                   | <b>9.14E-02</b> | <b>1.04</b><br>(0.91 - 1.19)              | <b>5.40E-01</b> | <b>1.10</b><br>(1.05 - 1.16)                         | <b>2.10E-04</b> | <b>16.9</b>    |
| 7   | <i>GCK</i>      | rs1990458         | T             | 0.93<br>(0.90 - 0.96)                            | 1.67E-06        | 0.96<br>(0.88 - 1.05)                                  | 4.21E-01        | 1.13<br>(0.97-1.31)                          | 1.18E-01        | 1.07<br>(0.96 - 1.20)                     | 2.36E-01        | 0.95<br>(0.92 - 0.98)                                | 2.63E-04        | 0              |
| 2   | <i>THADA</i>    | rs10200833        | C             | 0.94<br>(0.91 - 0.98)                            | 2.63E-03        | 0.97<br>(0.89 - 1.06)                                  | 5.53E-01        | 0.93<br>(0.74-1.17)                          | 5.61E-01        | 0.87<br>(0.69 - 1.10)                     | 2.33E-01        | 0.95<br>(0.92 - 0.98)                                | 1.42E-03        | 16.1           |
| 3   | <i>ADAMTS9</i>  | rs9860730         | G             | 0.95<br>(0.92 - 0.98)                            | 1.24E-03        | 0.97<br>(0.89 - 1.07)                                  | 5.67E-01        | 0.89<br>(0.77-1.03)                          | 1.30E-01        | 1.00<br>(0.89 - 1.13)                     | 9.38E-01        | 0.95<br>(0.93 - 0.98)                                | 1.77E-03        | 0              |
| 1   | <i>NOTCH2</i>   | rs2641348         | G             | 1.06<br>(1.01 - 1.12)                            | 1.95E-02        | 1.04<br>(0.96 - 1.12)                                  | 3.21E-01        | 1.04<br>(0.83-1.29)                          | 7.44E-01        | 1.19<br>(0.92 - 1.54)                     | 1.76E-01        | 1.06<br>(1.02 - 1.11)                                | 6.18E-03        | 0              |
| 9   | <i>CDKN2A/B</i> | rs10757282        | C             | 1.04<br>(1.01 - 1.08)                            | 2.23E-02        | 1.06<br>(0.97 - 1.15)                                  | 1.83E-01        | 1.02<br>(0.88-1.19)                          | 7.91E-01        | 1.03<br>(0.84 - 1.27)                     | 7.81E-01        | 1.04<br>(1.01 - 1.07)                                | 6.71E-03        | 8.5            |
| 11  | <i>MTNR1B</i>   | rs10830963        | G             | 1.05<br>(1.01 - 1.08)                            | 8.07E-03        | 1.06<br>(0.92 - 1.22)                                  | 4.11E-01        | 1.12<br>(0.94-1.32)                          | 2.13E-01        | 0.95<br>(0.84 - 1.06)                     | 3.49E-01        | 1.04<br>(1.01 - 1.07)                                | 9.88E-03        | 8.1            |

| Chr | Candidate gene       | Lead SNP on array | Effect Allele | Caucasian IBC<br>(14,073 cases, 57,489 controls) |          | African American IBC<br>(1,986 cases & 7,695 controls) |          | Hispanic IBC<br>(592 cases & 1,410 controls) |          | Asian IBC<br>(767 cases & 3,704 controls) |          | Multi-ethnic IBC<br>(17,418 cases & 70,298 controls) |          |                |
|-----|----------------------|-------------------|---------------|--------------------------------------------------|----------|--------------------------------------------------------|----------|----------------------------------------------|----------|-------------------------------------------|----------|------------------------------------------------------|----------|----------------|
|     |                      |                   |               | OR (95% CI)                                      | P        | OR (95% CI)                                            | P        | OR (95% CI)                                  | P        | OR (95% CI)                               | P        | OR (95% CI)                                          | P        | i <sup>2</sup> |
| 7   | <i>JAZF1</i>         | rs121113122       | G             | 1.55<br>(1.11 - 2.15)                            | 5.13E-02 | 1.09<br>(0.98 - 1.22)                                  | 1.08E-01 | 1.25<br>(0.79-2.00)                          | 3.41E-01 | 1.11<br>(0.75 - 1.64)                     | 0.60     | 1.14<br>(1.03 - 1.25)                                | 1.11E-02 | 0              |
| 12  | <i>TSPAN8/LGR5</i>   | rs7961581         | C             | 1.06<br>(1.01 - 1.10)                            | 1.57E-02 | 0.98<br>(0.90 - 1.08)                                  | 7.32E-01 | 0.97<br>(0.81-1.17)                          | 7.61E-01 | 0.99<br>(0.78 - 1.25)                     | 9.07E-01 | 1.04<br>(1.00 - 1.08)                                | 3.05E-02 | 0              |
| 10  | <i>CDC123/CAMK1D</i> | rs12779790        | G             | 1.07<br>(0.99 - 1.15)                            | 7.28E-02 | 1.02<br>(0.73 - 1.44)                                  | 9.00E-01 | 0.83<br>(0.41-1.68)                          | 6.04E-01 | 1.02<br>(0.73 - 1.44)                     | 9.00E-01 | 1.06<br>(0.99 - 1.14)                                | 8.67E-02 | 0              |
| 11  | <i>CENTD2</i>        | rs615703          | A             | 1.77<br>(1.03 - 3.02)                            | 3.78E-02 | 0.94<br>(0.86 - 1.02)                                  | 1.52E-01 | 0.97<br>(0.66-1.41)                          | 8.66E-01 | 0.92<br>(0.68 - 1.25)                     | 6.06E-01 | 0.95<br>(0.87 - 1.03)                                | 2.02E-01 | 0              |
| 15  | <i>ZFAND6</i>        | rs2903265         | A             | 0.99<br>(0.95 - 1.02)                            | 4.62E-01 | 1.01<br>(0.94 - 1.09)                                  | 6.96E-01 | 0.92<br>(0.78-1.09)                          | 3.46E-01 | 0.93<br>(0.83 - 1.04)                     | 2.10E-01 | 0.99<br>(0.96 - 1.02)                                | 3.68E-01 | 0              |
| 7   | <i>DGKB-TMEM195</i>  | rs10244051        | T             | 0.96<br>(0.88 - 1.05)                            | 4.02E-01 | 1.00<br>(0.78 - 1.28)                                  | 9.86E-01 | 0.78<br>(0.46-1.31)                          | 3.49E-01 | 1.00<br>(0.78 - 1.28)                     | 9.86E-01 | 0.98<br>(0.90 - 1.06)                                | 5.41E-01 | 12.1           |
| 12  | <i>HNF1A</i>         | rs208297          | T             | 5.63<br>(1.62 - 19.6)                            | 6.62E-03 | 0.96<br>(0.80 - 1.15)                                  | 6.36E-01 | 1.34<br>(0.56-3.19)                          | 5.13E-01 | 0.88<br>(0.34 - 2.27)                     | 0.78     | 1.00<br>(0.84 - 1.19)                                | 9.72E-01 | 28             |

**Table S7. Association results for T2D loci in European, African American, Hispanic and Asian populations. T2D risk variants with study-wide or borderline significance implicated by this study are highlighted in bold.**

| Study                                  | Effect/<br>other allele | Effect<br>allele<br>frequency | OR (95% CI)        | P        | n=T2D cases/<br>controls |
|----------------------------------------|-------------------------|-------------------------------|--------------------|----------|--------------------------|
| Look AHEAD (cases)<br>/ARIC (controls) | T/C                     | 0.31                          | 1.59 (1.45 - 1.75) | 4.86E-22 | 2793/4124                |
| CCCS                                   | T/C                     | 0.29                          | 1.75 (1.48 - 2.07) | 9.36E-11 | 495/1091                 |
| ARIC                                   | T/C                     | 0.30                          | 1.35 (1.23 - 1.48) | 1.66E-10 | 1278/2600                |
| EPIC-NL                                | T/C                     | 0.31                          | 1.50 (1.31 - 1.73) | 5.62E-09 | 1033/1888                |
| LURIC                                  | T/C                     | 0.30                          | 1.47 (1.29 - 1.68) | 7.19E-09 | 868/1875                 |
| CHS                                    | T/C                     | 0.30                          | 1.46 (1.27 - 1.67) | 4.67E-08 | 576/3375                 |
| Procardis                              | T/C                     | 0.30                          | 1.47 (1.28 - 1.69) | 5.12E-08 | 615/5835                 |
| WHI                                    | T/C                     | 0.29                          | 1.75 (1.43 - 2.13) | 5.49E-08 | 271/5259                 |
| PennCAC                                | T/C                     | 0.32                          | 1.54 (1.31 - 1.82) | 1.53E-07 | 838/1274                 |
| MERLIN                                 | T/C                     | 0.30                          | 1.47 (1.27 - 1.70) | 2.07E-07 | 799/1131                 |
| FHS                                    | T/C                     | 0.29                          | 1.44 (1.24 - 1.67) | 1.48E-06 | 427/6272                 |
| UCP                                    | T/C                     | 0.32                          | 1.57 (1.30 - 1.89) | 2.99E-06 | 479/643                  |
| ASCOT                                  | T/C                     | 0.29                          | 1.59 (1.29 - 1.96) | 1.22E-05 | 235/2426                 |
| BWHHS                                  | T/C                     | 0.28                          | 1.41 (1.19 - 1.67) | 8.08E-05 | 1508/1902                |
| MEDAL                                  | T/C                     | 0.29                          | 1.36 (1.16 - 1.59) | 0.00014  | 465/4063                 |
| CLEAR                                  | T/C                     | 0.30                          | 1.43 (1.18 - 1.73) | 0.00025  | 317/1282                 |
| PennCATH                               | T/C                     | 0.32                          | 1.40 (1.13 - 1.73) | 0.0022   | 237/1092                 |
| MESA                                   | T/C                     | 0.30                          | 1.37 (1.11 - 1.69) | 0.0030   | 239/2047                 |
| PHFS/CH Study                          | T/C                     | 0.30                          | 1.25 (1.06 - 1.47) | 0.0072   | 519/1617                 |
| INVEST                                 | T/C                     | 0.30                          | 1.25 (1.01 - 1.54) | 0.040    | 306/654                  |
| WH-II                                  | T/C                     | 0.29                          | 1.20 (1.00 - 1.43) | 0.046    | 336/4214                 |
| SMART                                  | T/C                     | 0.30                          | 1.47 (1.00 - 2.17) | 0.052    | 102/386                  |
| CFS                                    | T/C                     | 0.26                          | 1.59 (0.93 - 2.72) | 0.089    | 14/223                   |
| KORA                                   | T/C                     | 0.29                          | 1.11 (0.92 - 1.36) | 0.28     | 379/1224                 |
| CARDIA                                 | T/C                     | 0.30                          | 1.05 (0.58 - 1.88) | 0.88     | 22/1366                  |

**Table S8. Association results for TCF7L2 rs7903146 in 25 studies included in the European ancestry IBC meta-analysis.**

| Chr | NCBI 36 position | Candidate gene  | SNP        | Effect Allele | Effect Allele Freq IBC | OR (95% CI)      | <i>P</i> | <i>i</i> <sup>2</sup> (%) |
|-----|------------------|-----------------|------------|---------------|------------------------|------------------|----------|---------------------------|
| 1   | 114105331        | <i>RSBN1</i>    | rs6679677  | A             | 0.095                  | 1.06 (1.00-1.11) | 0.04     | 14.4                      |
| 1   | 114179091        | <i>PTPN22</i>   | rs2476601  | A             | 0.096                  | 1.05 (1.00-1.11) | 0.04     | 17                        |
| 1   | 205006527        | <i>IL10</i>     | rs3024505  | A             | 0.16                   | 0.97 (0.86-1.10) | 0.67     | 1.2                       |
| 2   | 162832297        | <i>IFIH1</i>    | rs1990760  | C             | 0.396                  | 1.00 (0.97-1.03) | 0.81     | 2.1                       |
| 2   | 204447164        | <i>CTLA4</i>    | rs3087243  | A             | 0.448                  | 1.01 (0.98-1.04) | 0.51     | 0                         |
| 4   | 123548812        | <i>ADAD1</i>    | rs17388568 | A             | 0.275                  | 1.01 (0.97-1.04) | 0.73     | 12.8                      |
| 5   | 35910332         | <i>IL7R</i>     | rs6897932  | T             | 0.265                  | 0.98 (0.94-1.02) | 0.3      | 0                         |
| 5   | 132656783        | <i>FSTL4</i>    | rs17166496 | G             | 0.412                  | 0.99 (0.96-1.02) | 0.35     | 0                         |
| 10  | 6512897          | <i>PRKCQ</i>    | rs11258747 | T             | 0.221                  | 0.98 (0.95-1.02) | 0.29     | 2.6                       |
| 11  | 2126350          | <i>IGF2AS</i>   | rs3741208  | A             | 0.359                  | 0.97 (0.94-1.01) | 0.1      | 16                        |
| 11  | 2126719          | <i>INS-IGF2</i> | rs1004446  | A             | 0.373                  | 1.01 (0.98-1.04) | 0.59     | 34.7                      |
| 12  | 9724895          | <i>CLEC2D</i>   | rs3764021  | T             | 0.469                  | 1.00 (0.97-1.03) | 0.91     | 37.3                      |
| 12  | 54756892         | <i>ERBB3</i>    | rs11171739 | C             | 0.417                  | 0.98 (0.95-1.02) | 0.3      | 22.4                      |
| 12  | 110368991        | <i>SH2B3</i>    | rs3184504  | T             | 0.497                  | 1.04 (1.00-1.07) | 0.03     | 32.5                      |
| 12  | 110971201        | <i>C12orf30</i> | rs17696736 | G             | 0.451                  | 1.02 (0.99-1.05) | 0.17     | 29.1                      |
| 16  | 11087374         | <i>CLEC16A</i>  | rs12708716 | G             | 0.365                  | 1.01 (0.97-1.04) | 0.72     | 0                         |
| 18  | 12769947         | <i>PTPN2</i>    | rs2542151  | G             | 0.159                  | 0.98 (0.94-1.03) | 0.44     | 0                         |
| 18  | 65682622         | <i>CD226</i>    | rs763361   | T             | 0.478                  | 1.02 (0.99-1.06) | 0.2      | 15.1                      |

**Table S9. Association results for known T1D associated SNPs in the European Ancestry IBC T2D meta-analysis.**
